# Supplementary material for: Exploring metal carbamates as precursors for the synthesis of metal–organic frameworks
Source: Royal Society of Chemistry journal article supplement (doi:10.1039/d4dt01618a), 2024-01-01
Supplement: d4dt01618a1.pdf [file d4dt01618a1.pdf]

# Exploring Metal Carbamates as Precursors for the Synthesis of Metal-Organic Frameworks

Stefania Volante,<sup>a,b</sup> Matous Kloda,<sup>c</sup> Jan Demel,<sup>c</sup> Guido Pampaloni,<sup>a,b</sup> Fabio Marchetti,<sup>a,b</sup> Giulio Bresciani,<sup>a,b\*</sup> Marco Taddei.<sup>a,b\*</sup>

<sup>a</sup> University of Pisa, Dipartimento di Chimica e Chimica Industriale, 56124 Pisa, Italy.

<sup>b</sup> CIRCC, Via Celso Ulpiani 27, I-70126 Bari, Italy.

<sup>c</sup> Institute of Inorganic Chemistry of the Czech Academy of Sciences, Husinec-Řež-1001, 250 68 Řež, Czech Republic

\*E-mail addresses: [giulio.bresciani@dcci.unipi.it](mailto:giulio.bresciani@dcci.unipi.it); [marco.taddei@unipi.it](mailto:marco.taddei@unipi.it)

## ELECTRONIC SUPPLEMENTARY INFORMATION

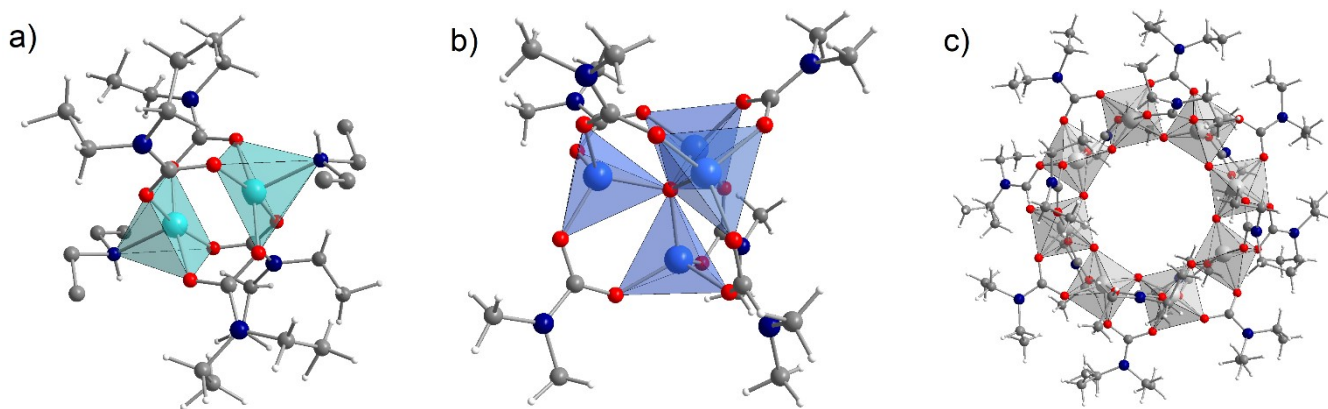

**Figure S1:** Structures of  $\text{Cu}_2(\text{O}_2\text{CNEt}_2)_4 \cdot (\text{HNEt}_2)_2$  (left),  $\text{Zn}_4\text{O}(\text{O}_2\text{CNMe}_2)_6$  (center) and  $\text{Ti}_8\text{O}_8(\text{O}_2\text{CNEt}_2)_{16}$  (right). These structures are analogous of SBUs found in HKUST-1, UiO-66 and MIL-125, respectively.

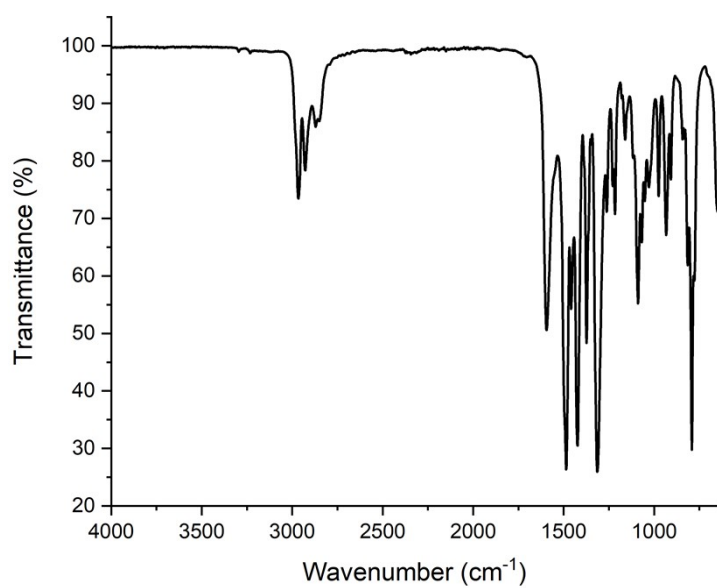

**Figure S2:** IR spectrum of  $\text{Cu}_2(\text{O}_2\text{CNEt}_2)_4 \cdot 2\text{NHet}_2$  (**CuCBM**)

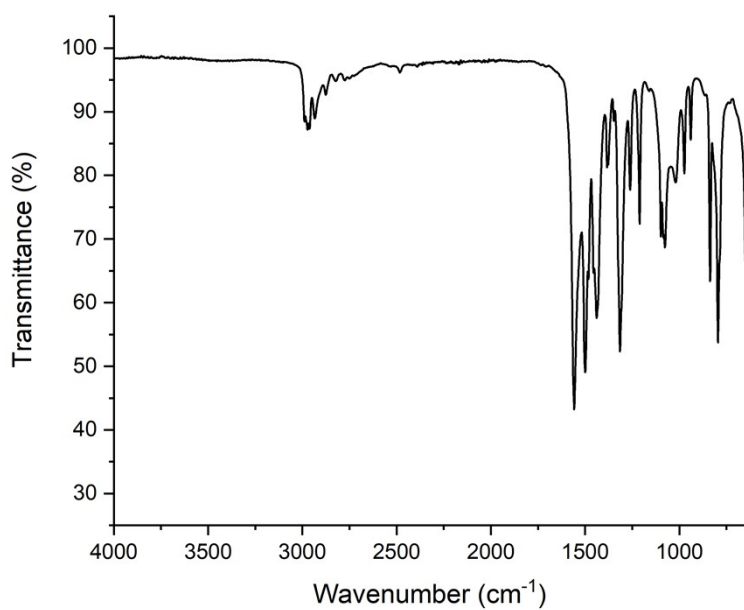

**Figure S3:** IR spectrum of  $\text{Zr}(\text{O}_2\text{CNEt}_2)_4$  (**ZrCBM**).

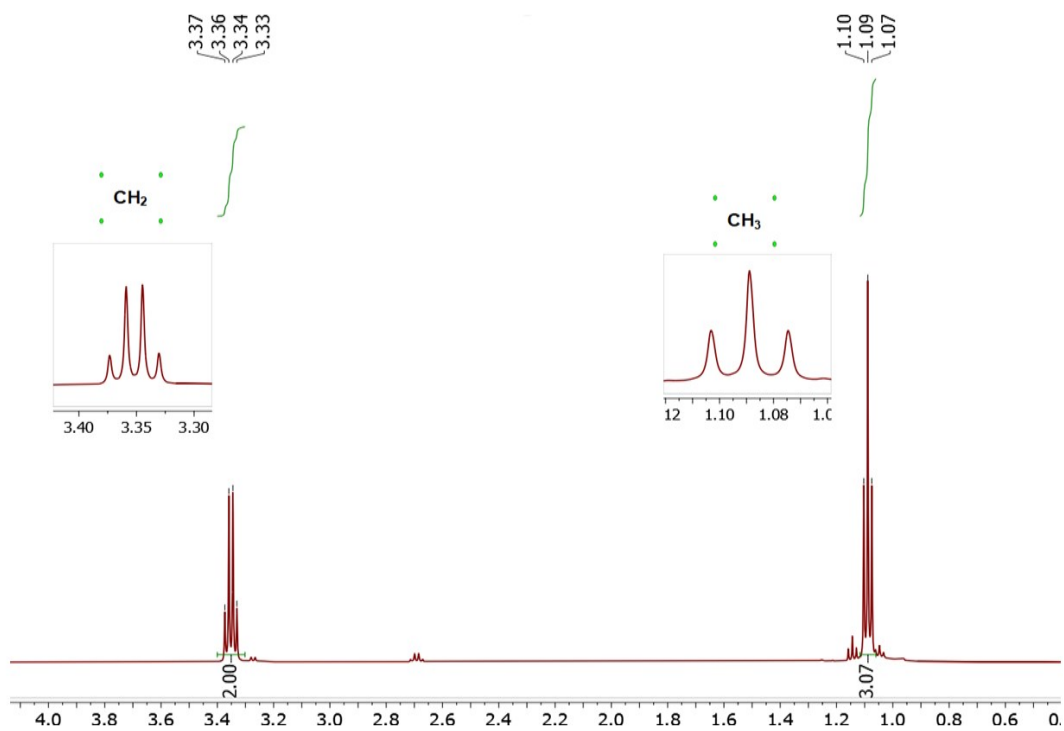

**Figure S4:**  $^1\text{H}$  NMR spectrum (400MHz,  $\text{CDCl}_3$ ) of  $\text{Zr}(\text{O}_2\text{CNEt}_2)_4$  (ZrCBM).

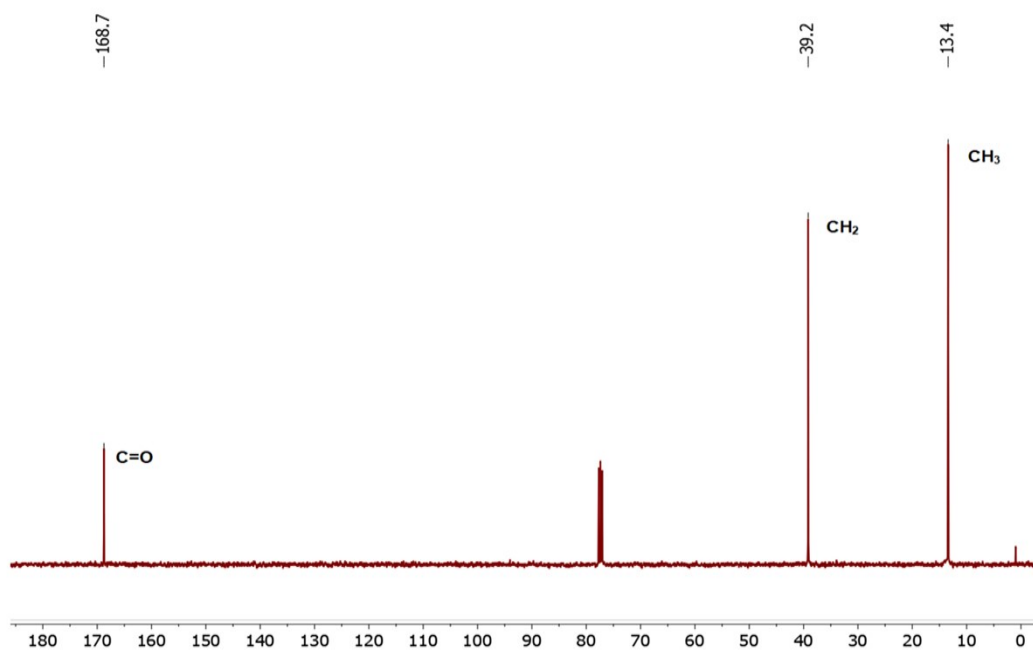

**Figure S5:**  $^{13}\text{C}$  NMR spectrum (100 MHz,  $\text{CDCl}_3$ ) of  $\text{Zr}(\text{O}_2\text{CNEt}_2)_4$  (ZrCBM).

**Table S1:** Syntheses of HKUST-1 conducted in DMF. The precursors are: **CuCBM** = Copper (II) *N,N*-diethylcarbamate, **CuOAc** = Copper (II) Acetate, **CuCl<sub>2</sub>** = Anhydrous copper(II) chloride. The linker is **P** = H<sub>3</sub>BTC. The addition methods are **s** = single addition, **g** = gradual addition. FWHM (Full width at half maximum) was evaluated for the 222 reflection located at 11.6 °2θ.

| Entry | Sample                          | Linker Addition method | Yield (mg) | FWHM (°) |
|-------|---------------------------------|------------------------|------------|----------|
| 1     | CuOAc_DMF-P-T140-s              | Single                 | 94         | 0.22     |
| 2     | CuCBM_DMF-P-T140-s              | Single                 | 96         | 0.20     |
| 3     | CuCl <sub>2</sub> _DMF-P-T140-s | Single                 | No product | ---      |
| 4     | CuOAc_DMF-P-s                   | Single                 | No product | ---      |
| 5     | CuCBM_DMF-P-s                   | Single                 | 99         | 0.27     |
| 6     | CuCl <sub>2</sub> _DMF-P-s      | Single                 | No product | ---      |
| 7     | CuCBM_DMF-P-g                   | Gradual                | 98         | 0.23     |

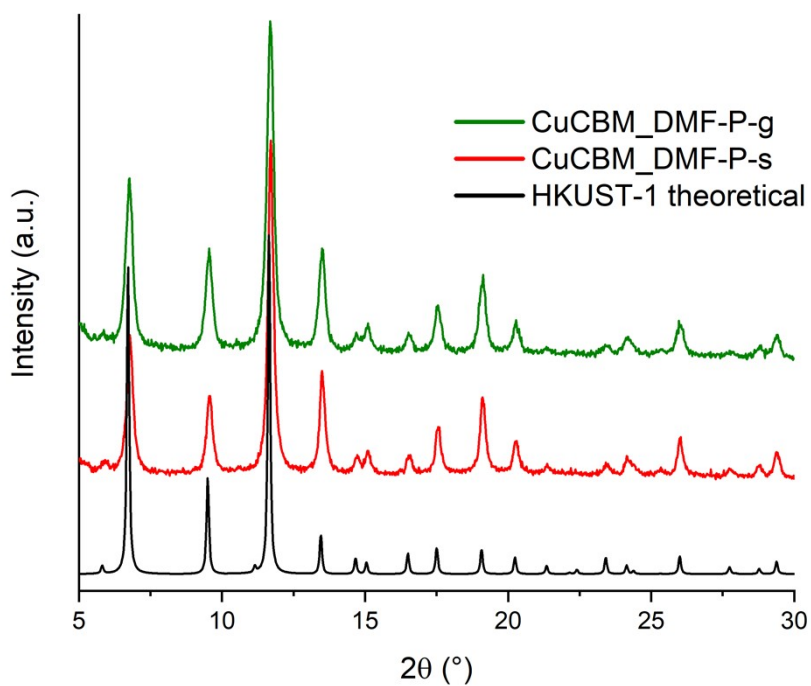

**Figure S6:** PXRD patterns of **CuCBM\_DMF-P-g** (green line), **CuCBM\_DMF-P-s** (red line), and the theoretical pattern of HKUST-1 (black line).

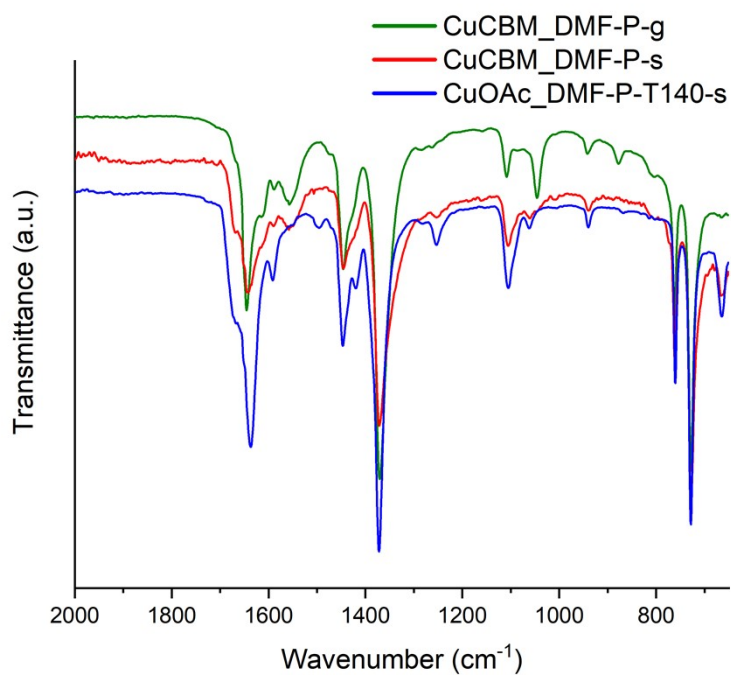

**Figure S7:** IR spectra of **CuCBM\_DMF-P-g** (green line), **CuCBM\_DMF-P-s** (red line) and **CuOAc\_DMF-P-T140-s** (blue line) used as reference.

**Table S2:** Syntheses of HKUST-1 conducted in DMF with deprotonated linker. Linkers are  $D^I = H_2BTC^-$ ,  $D^{II} = HBTC^{2-}$ ,  $D^{III} = BTC^{3-}$ . The addition methods are **s** = single addition, **g** = gradual addition. FWHM (Full width at half maximum) was evaluated for the 222 reflection located at  $11.6^\circ 2\theta$ .

| Entry | Sample name                          | Deprotonating agent      | Linker Addition method | Yield (mg) | FWHM ( $^\circ$ ) |
|-------|--------------------------------------|--------------------------|------------------------|------------|-------------------|
| 1     | CuOAc_DMF- $D^{III}$ -s              | NHEt <sub>2</sub> , 3 eq | Single                 | 90         | 0.28              |
| 2     | CuCl <sub>2</sub> _DMF- $D^{III}$ -s | NHEt <sub>2</sub> , 3 eq | Single                 | 103        | 0.50              |
| 3     | CuCBM_DMF- $D^{III}$ -s              | NHEt <sub>2</sub> , 3 eq | Single                 | 83         | 0.19              |
| 4     | CuCBM_DMF- $D^I$ -g                  | NHEt <sub>2</sub> , 1 eq | Gradual                | 100        | 0.20              |
| 5     | CuCBM_DMF- $D^{II}$ -g               | NHEt <sub>2</sub> , 2 eq | Gradual                | 103        | 0.19              |
| 6     | CuCBM_DMF- $D^{III}$ -g              | NHEt <sub>2</sub> , 3 eq | Gradual                | 46         | 0.14              |

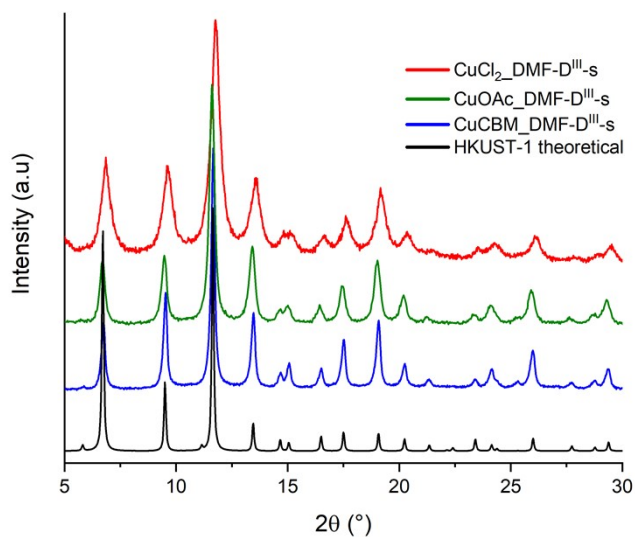

**Figure S8:** XRD patterns of CuCl<sub>2</sub>\_DMF- $D^{III}$ -s (red line), CuOAc\_DMF- $D^{III}$ -s (green line), CuCBM\_DMF- $D^{III}$ -s (blue line) compared with the theoretical pattern of HKUST-1 (black line).

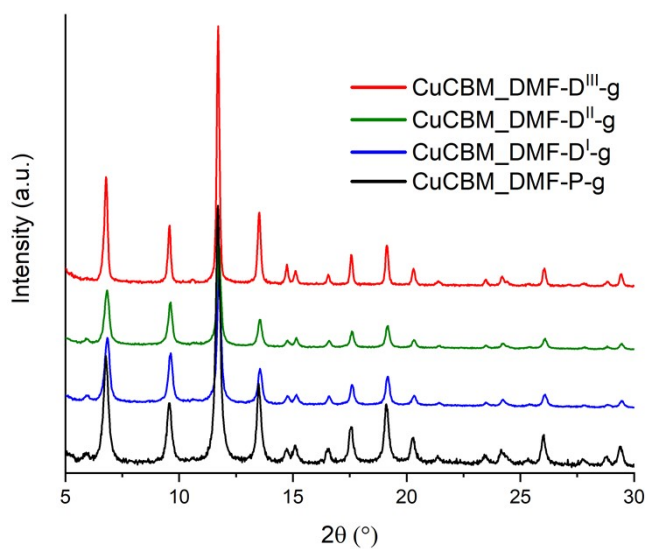

**Figure S9:** PXRD patterns of **CuCBM\_DMF-D<sup>III</sup>-s** (red line), **CuCBM\_DMF-D<sup>II</sup>-g** (green line), **CuCBM\_DMF-D<sup>I</sup>-g** (blue line) compared with **CuCBM\_DMF-P-g** (black line).



**Table S3:** Syntheses conducted in DMF with deprotonated linker using DBU as the base. The precursors are: **CuCBM** = Copper(II) *N,N*-diethylcarbamate, **CuOAc** = Copper(II) Acetate, **CuCl<sub>2</sub>** = Anhydrous copper(II) chloride. The linkers are: **D<sup>I</sup>** = H<sub>2</sub>BTC<sup>-</sup>, **D<sup>II</sup>** = HBTC<sup>2-</sup>, **D<sup>III</sup>** = BTC<sup>3-</sup>. The addition methods is: **s** = single addition. Reaction temperature is 25 °C and reaction time is 24 h. FWHM (Full width at half maximum) was evaluated for the 222 reflection located at 11.6 °2θ.

| Entry | Sample name                                 | Deprotonating agent | Linker Addition method | Yield (mg) | FWHM (°) |
|-------|---------------------------------------------|---------------------|------------------------|------------|----------|
| 1     | CuCBM_DMF-D <sup>III</sup> #-s              | DBU, 3 eq           | Single                 | 38         | 0.57     |
| 2     | CuOAc_DMF-D <sup>III</sup> #-s              | DBU, 3 eq           | Single                 | 128        | 0.59     |
| 3     | CuCl <sub>2</sub> _DMF-D <sup>III</sup> #-s | DBU, 3 eq           | Single                 | 86         | 0.44     |

[#] DBU used as deprotonating agent.

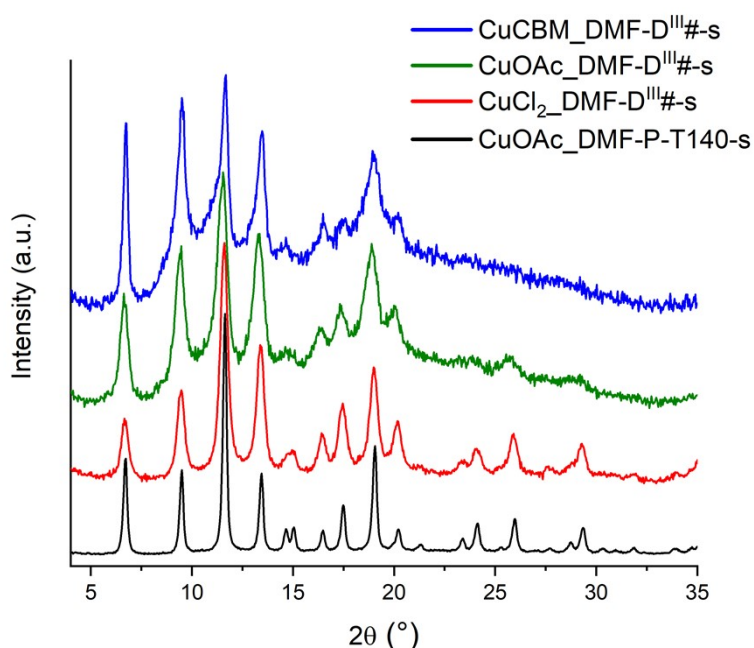

**Figure S10:** PXRD patterns comparison of **CuCBM\_DMF-D<sup>III</sup>#-s** (blue line), **CuOAc\_DMF-D<sup>III</sup>#-s** (green line), **CuCl<sub>2</sub>\_DMF-D<sup>III</sup>#-s** (red line) and reference HKUST-1 (black line).

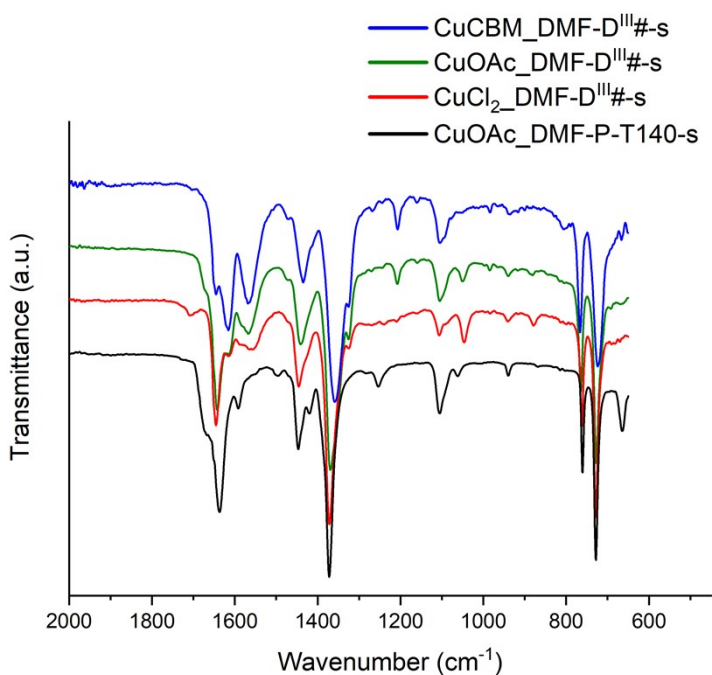

**Figure S11:** IR spectra of **CuCBM\_DMF-D<sup>III</sup>#-s** (blue line), **CuOAc\_DMF-D<sup>III</sup>#-s** (green line), **CuCl<sub>2</sub>\_DMF-D<sup>III</sup>#-s** (red line) and reference HKUST-1 (black line). Bands at 1615, 1567 and 1325 cm<sup>-1</sup> are attributable to DBU.

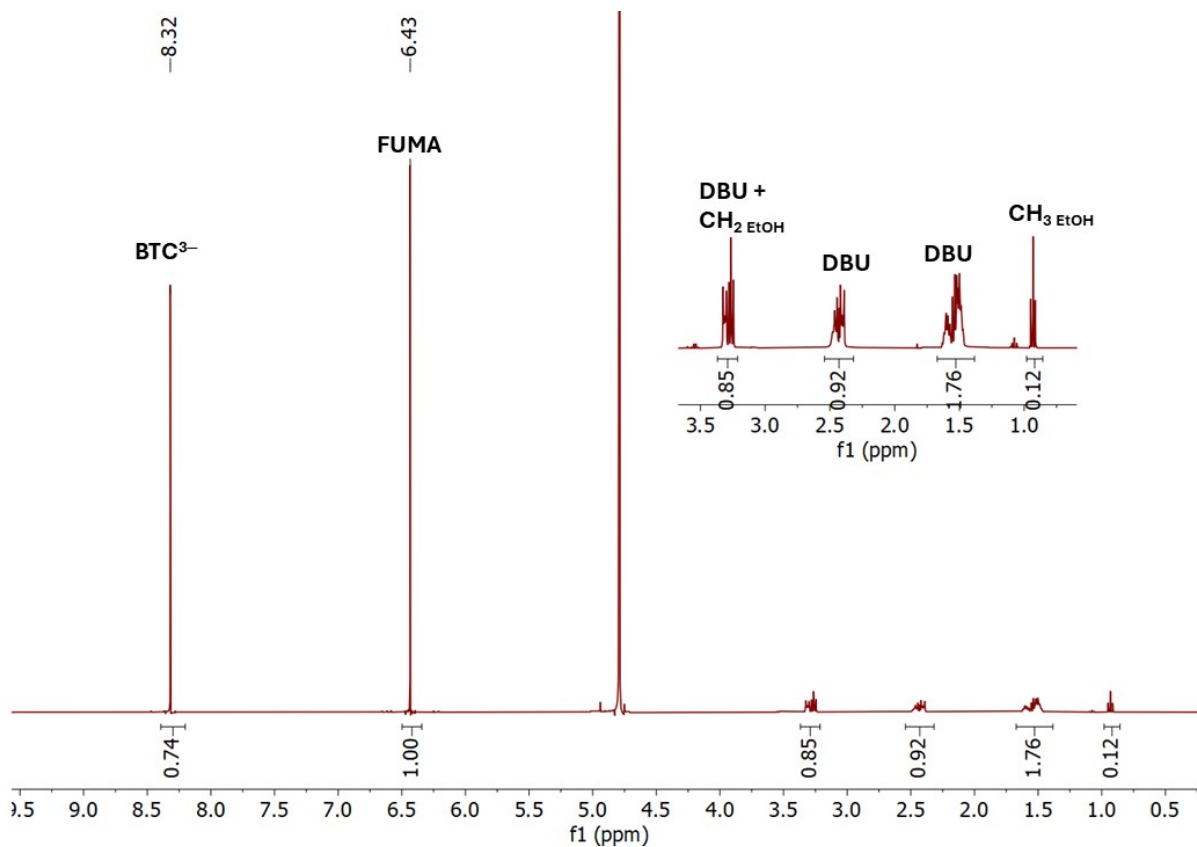

**Figure**

**e S12:** <sup>1</sup>H NMR spectrum of **CuCBM\_DMF-D<sup>III</sup>#-s** after digestion, using fumaric acid as internal standard. BTC<sup>3-</sup> = 1,3,5-benzetricarboxylate anion; FUMA = fumaric acid.

**Table S4:** Synthesis conducted in conducted in various solvents. The precursor is: **CuCBM** = Copper(II) carbamate. The linkers are: **P** = H<sub>3</sub>BTC, **D<sup>I</sup>** = H<sub>2</sub>BTC<sup>-</sup>, **D<sup>II</sup>** = HBTC<sup>2-</sup>, **D<sup>III</sup>** = BTC<sup>3-</sup>. The addition method is: **g** = gradual addition method. Where not specified the reaction temperature is 25 °C, reaction time is 24 h. FWHM (Full width at half maximum) was evaluated for the 222 reflection located at 11.6 °2θ.

| Entry | Sample name                                    | Solvent               | Yield (mg) | FWHM (°) |
|-------|------------------------------------------------|-----------------------|------------|----------|
| 1     | CuCBM_EtOH-P-g                                 | EtOH                  | 115        | 0.26     |
| 2     | CuCBM_MeOH-P-g                                 | MeOH                  | 100        | 0.27     |
| 3     | CuCBM_THF-P-g                                  | THF                   | 136        | ---      |
| 4     | CuCBM_DIOX-P-g                                 | 1,4-Dioxane           | 111        | 0.27     |
| 5     | CuOAc_EtOH-P-g                                 | EtOH                  | 104        | ---      |
| 6     | CuCl <sub>2</sub> _EtOH-P-g                    | EtOH                  | No product | ---      |
| 7     | CuCBM_EtOH/H <sub>2</sub> O-D <sup>I</sup> -g  | EtOH/H <sub>2</sub> O | 82         | 0.13     |
| 8     | CuCBM_EtOH/H <sub>2</sub> O-D <sup>II</sup> -g | EtOH/H <sub>2</sub> O | 82         | ---      |
| 9     | CuCBM_EtOH-D <sup>III</sup> -g                 | EtOH                  | 45         | 0.26     |

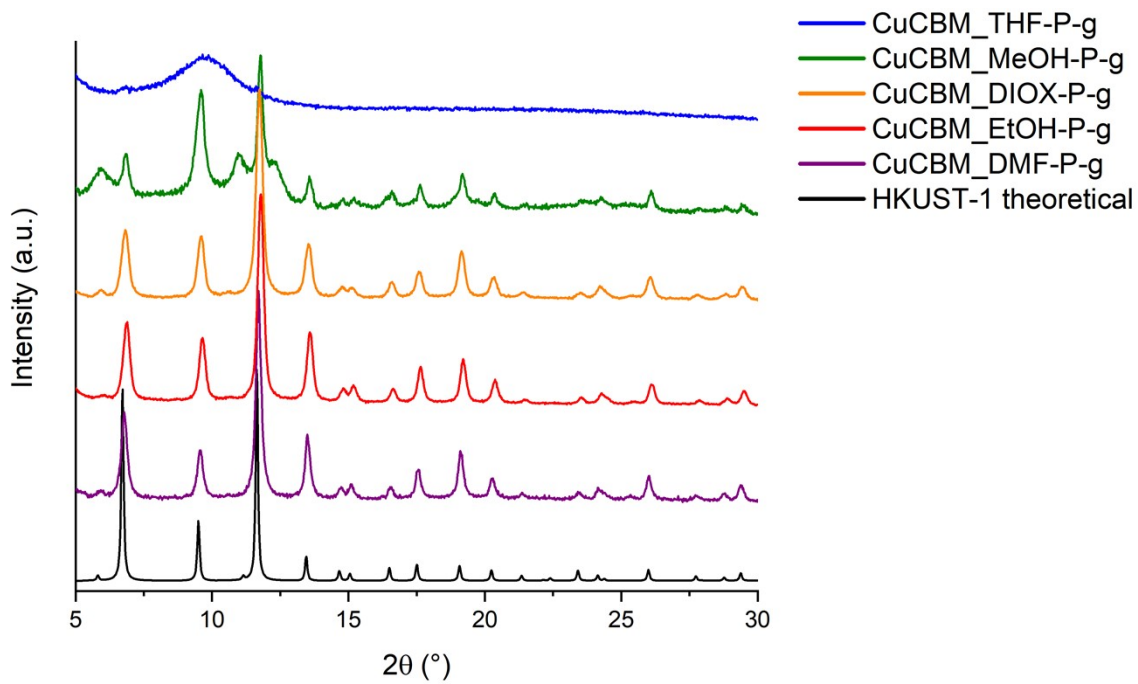

**Figure S13:** PXRD patterns of **CuCBM\_THF-P-g** (blue line), **CuCBM\_MeOH-P-g** (green line), **CuCBM\_DIOX-P-g** (orange line), **CuCBM\_EtOH-P-g** (red line), **CuCBM\_DMF-P-g** (purple line) and calculated pattern of HKUST-1 (black line).

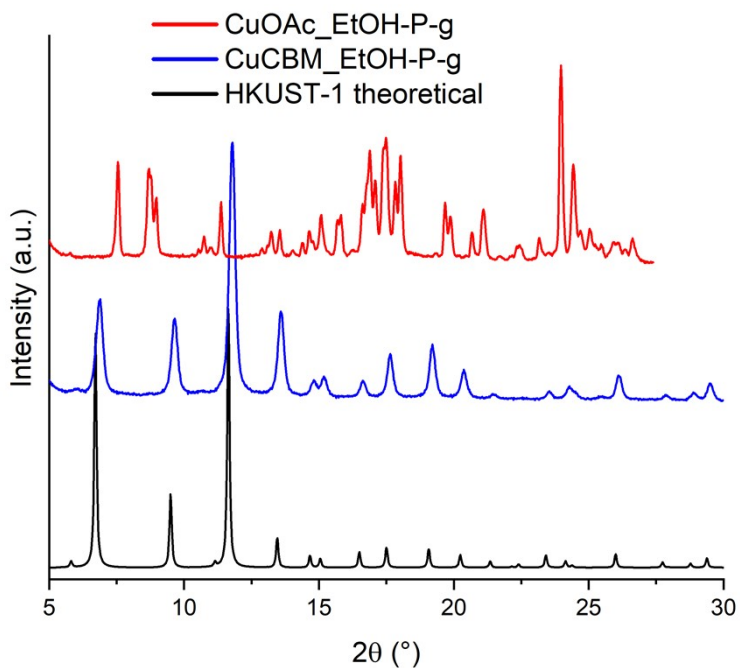

**Figure S14:** PXRD patterns of **CuOAc\_EtOH-P-g** (red line), **CuCBM\_EtOH-P-g** (blue line) and theoretical pattern of HKUST-1.

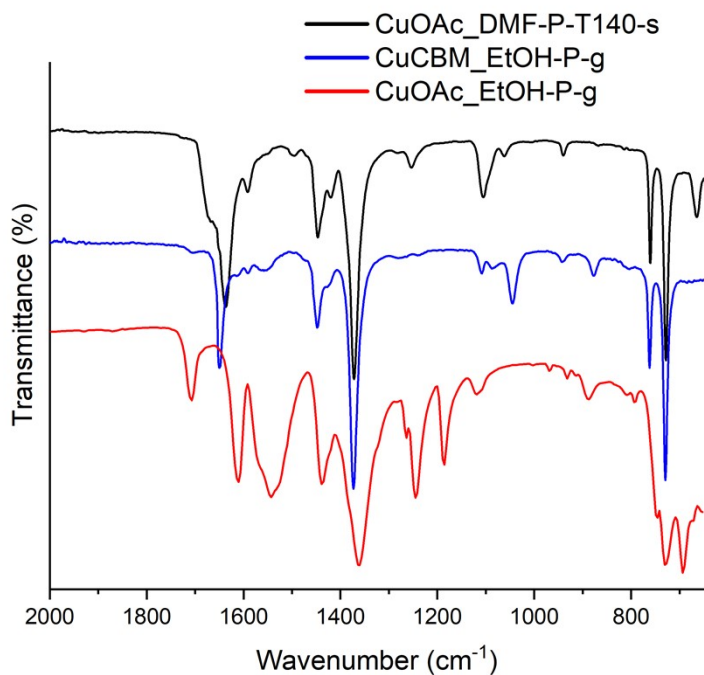

**Figure S15:** IR spectra of **CuOAc\_EtOH-P-g** (red line), **CuCBM\_EtOH-P-g** (blue line) and **CuCBM\_DMF-P-T140-s** (black line).

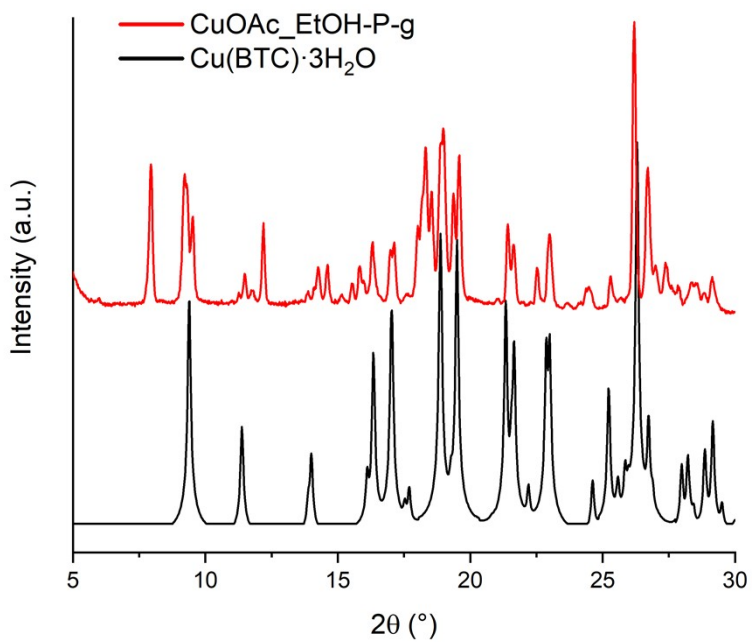

**Figure S16:** PXRD pattern of  $\text{CuOAc\_EtOH-P-g}$  (red line) compared with calculated pattern of  $\text{Cu}_3(\text{BTC})\cdot 3\text{H}_2\text{O}$  (black line).

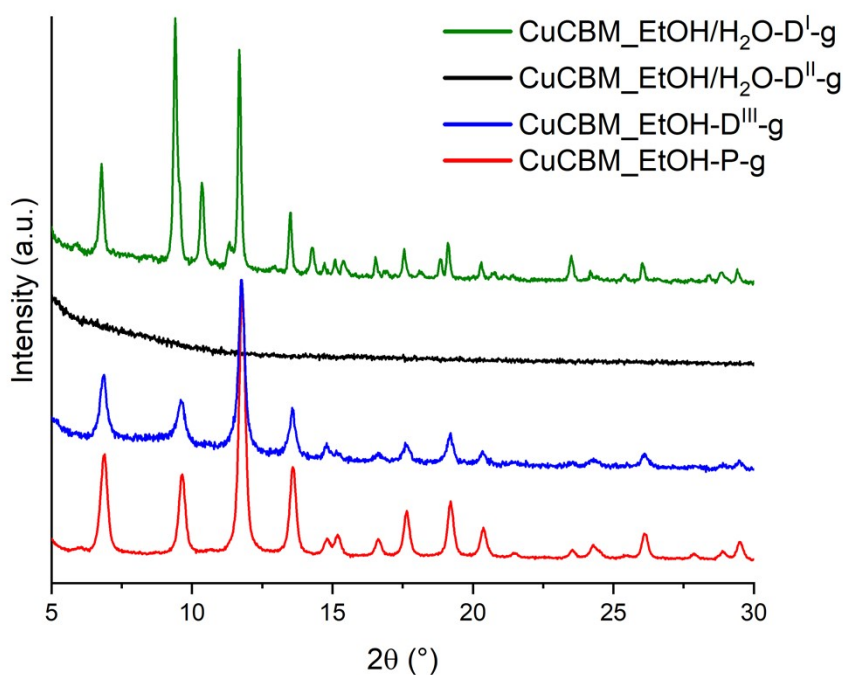

**Figure S17:** a) PXRD patterns of **CuCBM\_EtOH/H<sub>2</sub>O-D<sup>I</sup>-g** (green line), **CuCBM\_EtOH/H<sub>2</sub>O-D<sup>II</sup>-g** (black line), **CuCBM\_EtOH-D<sup>III</sup>-g** (blue line) and **CuCBM\_EtOH-P-g** (red line). Given the insolubility of the diethylammonium salts of H<sub>2</sub>BTC<sup>-</sup> and HBTC<sup>2-</sup> in pure ethanol, water (8 volume%) was added as a co-solvent for these linkers. The presence of water in the reaction environment led to the formation of either an undesired crystalline impurity when starting from H<sub>2</sub>BTC<sup>-</sup> or an amorphous product when starting from HBTC<sup>2-</sup>.

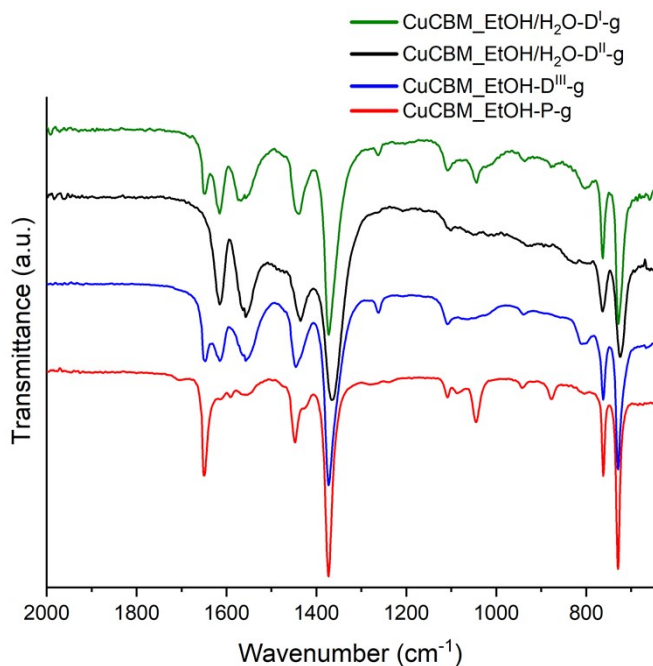

**Figure S18:** IR spectra of **CuCBM\_EtOH/H<sub>2</sub>O-D<sup>I</sup>-g** (purple line), **CuCBM\_EtOH/H<sub>2</sub>O-D<sup>II</sup>-g** (green line), **CuCBM\_EtOH-D<sup>III</sup>-g** (blue line) and **CuCBM\_EtOH-P-g** (red line).

**Table S5:** Syntheses conducted in DMF and EtOH using different addition method. The linker is **P** = H<sub>3</sub>BTC. The addition methods are: **g** = gradual addition, **sl** = slow addition using a syringe pump. FWHM (Full width at half maximum) was evaluated for the 222 reflection located at 11.6 °2θ.

| Entry | Sample name     | Linker Addition method | Yield (mg) | FWHM (°) |
|-------|-----------------|------------------------|------------|----------|
| 1     | CuCBM_DMF-P-g   | Gradual                | 98         | 0.23     |
| 2     | CuCBM_EtOH-P-g  | Gradual                | 115        | 0.26     |
| 3     | CuCBM_DMF-P-sl  | Syringe pump           | 125        | 0.25     |
| 4     | CuCBM_EtOH-P-sl | Syringe pump           | 135        | 0.25     |

**Table S6:** One-pot syntheses of HKUST-1. Samples are listed using abbreviations as follows: The precursor is **CuCl<sub>2</sub>** = Anhydrous copper(II) chloride. The linker is **P** = H<sub>3</sub>BTC. The addition methods are **s** = single addition, **sl** = slow addition using a syringe pump. FWHM (Full width at half maximum) was evaluated for the 222 reflection located at 11.6 °2θ.

| Entry | Sample name                                                          | Solvent | Linker Addition method | Yield (mg) | FWHM |
|-------|----------------------------------------------------------------------|---------|------------------------|------------|------|
| 1     | CuCl <sub>2</sub> /NHEt <sub>2</sub> /CO <sub>2</sub> _DMF-P-s-3eq   | DMF     | Single                 | 109        | 0.38 |
| 2     | CuCl <sub>2</sub> /NHEt <sub>2</sub> _DMF-P-s-3eq                    | DMF     | Single                 | 67         | 0.56 |
| 3     | CuCl <sub>2</sub> /NHEt <sub>2</sub> /CO <sub>2</sub> _DMF-P-s-6eq   | DMF     | Single                 | 95         | 0.35 |
| 4     | CuCl <sub>2</sub> /NHEt <sub>2</sub> /CO <sub>2</sub> _EtOH-P-s-6eq  | EtOH    | Single                 | 78         | 0.40 |
| 5     | CuCl <sub>2</sub> /NHEt <sub>2</sub> /CO <sub>2</sub> _DMF-P-sl-6eq  | DMF     | Syringe pump           | 115        | 0.25 |
| 6     | CuCl <sub>2</sub> /NHEt <sub>2</sub> /CO <sub>2</sub> _EtOH-P-sl-6eq | EtOH    | Syringe pump           | 118        | 0.25 |



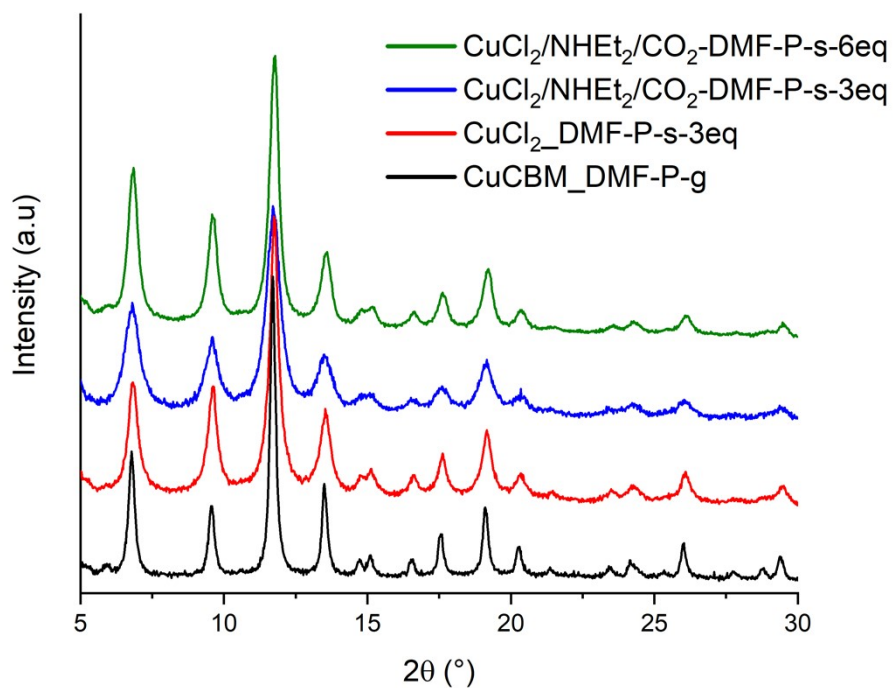

**Figure S19:** PXR D patterns of  $\text{CuCl}_2/\text{NH}_4\text{Et}_2/\text{CO}_2\text{-DMF-P-s-6eq}$  (green line),  $\text{CuCl}_2/\text{NH}_4\text{Et}_2/\text{CO}_2\text{-DMF-P-s-3eq}$  (blue line),  $\text{CuCl}_2\text{-DMF-P-s-3eq}$  (red line) and  $\text{CuCBM-DMF-P-g}$  (black line).

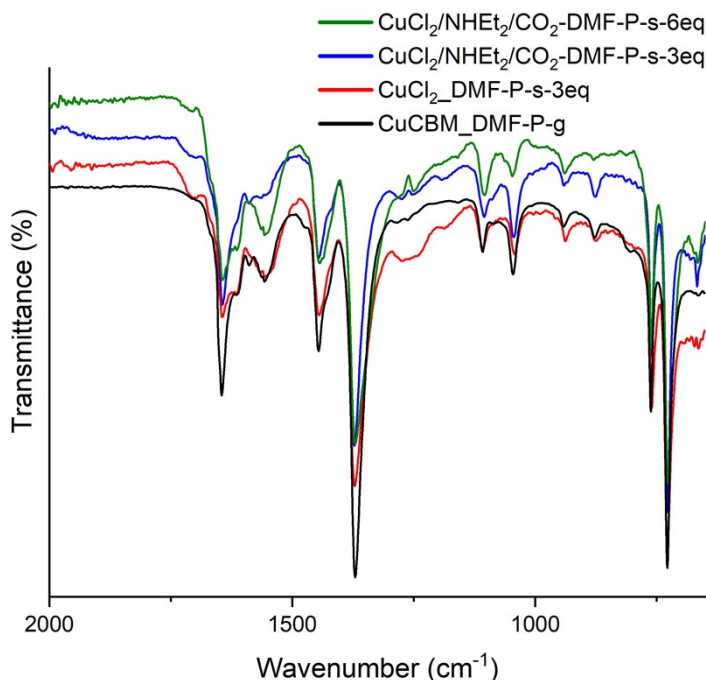

**Figure S20:** IR spectra of  $\text{CuCl}_2/\text{NH}_4\text{Et}_2/\text{CO}_2\text{-DMF-P-s-6eq}$  (green line),  $\text{CuCl}_2/\text{NH}_4\text{Et}_2/\text{CO}_2\text{-DMF-P-s-3eq}$  (blue line),  $\text{CuCl}_2\text{-DMF-P-s-3eq}$  (red line) and  $\text{CuCBM-DMF-P-g}$  (black line).

**Scheme S1:** A) Carbonation equilibrium of diethylamine to diethylammonium diethylcarbamate. B) Formation of **CuCBM** starting from **CuCl<sub>2</sub>**. This reaction, when conducted in DMF, is assumed to be an equilibrium. The stoichiometry of this reaction requires at least five equivalents of amine to obtain one equivalent of **CuCBM**.

A)

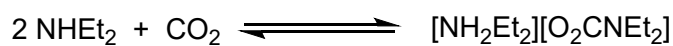

B)

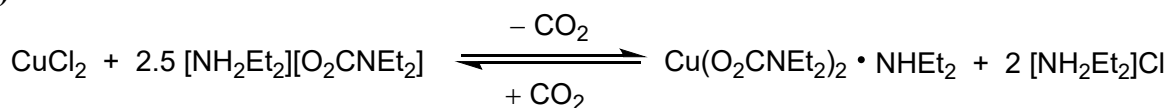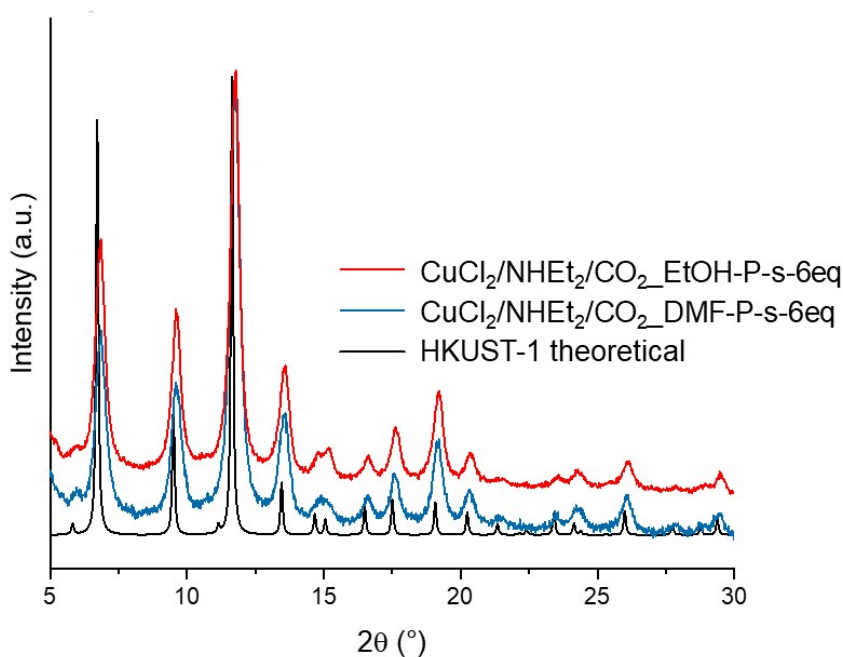

**Figure S21:** PXRD patterns of  $\text{CuCl}_2/\text{NHEt}_2/\text{CO}_2_{\text{EtOH-P-s-6eq}}$  (red line),  $\text{CuCl}_2/\text{NHEt}_2/\text{CO}_2_{\text{DMF-P-s-6eq}}$  (blue line) and theoretical pattern of HKUST-1. (black line).

**Table S7:** Theoretical and experimental percentage of  $\text{BTC}^{3-}$  ligand for HKUST-1 samples calculated from  $^1\text{H-NMR}$  spectra.

| Sample                                                                | Hypothetical Formula                                                  | $\text{BTC}^{3-}$<br>theo<br>[%] | $\text{BTC}^{3-}$<br>exp<br>[%] |
|-----------------------------------------------------------------------|-----------------------------------------------------------------------|----------------------------------|---------------------------------|
| <b>CuOAc_DMF-P-T140-s</b>                                             | $\text{Cu}_3(\text{BTC})_2(\text{DMF})_{3.30}$                        | 48.9                             | 53.8                            |
| <b>CuCBM_DMF-P-sl</b>                                                 | $\text{Cu}_3(\text{BTC})_2(\text{NHEt}_2)_{0.22}(\text{EtOH})_{0.44}$ | 64.6                             | 64.7                            |
| <b>CuCBM_EtOH-P-sl</b>                                                | $\text{Cu}_3(\text{BTC})_2(\text{NHEt}_2)_{0.40}(\text{EtOH})_{0.60}$ | 62.6                             | 65.9                            |
| <b>CuCl<sub>2</sub>/NHEt<sub>2</sub>/CO<sub>2</sub>_DMF-P-sl-6eq</b>  | $\text{Cu}_3(\text{BTC})_2(\text{NHEt}_2)_{0.70}(\text{EtOH})_{0.04}$ | 63.0                             | 62.0                            |
| <b>CuCl<sub>2</sub>/NHEt<sub>2</sub>/CO<sub>2</sub>_EtOH-P-sl-6eq</b> | $\text{Cu}_3(\text{BTC})_2(\text{NHEt}_2)_{0.32}(\text{EtOH})_{0.07}$ | 65.6                             | 62.4                            |

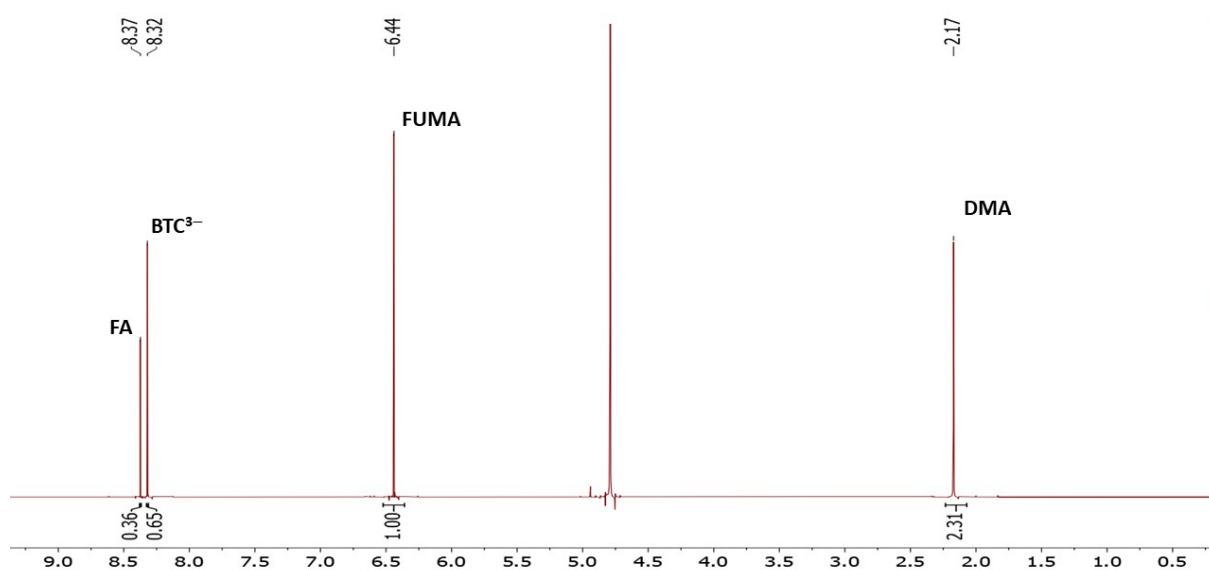

**Figure S22:**  $^1\text{H}$  NMR spectrum of **CuOAc\_DMF-P-T140-s** after digestion, using fumaric acid as internal standard. FA = formic acid;  $\text{BTC}^{3-}$  = 1,3,5-benzetricarboxylate anion; FUMA = fumaric acid; DMA = dimethylamine.

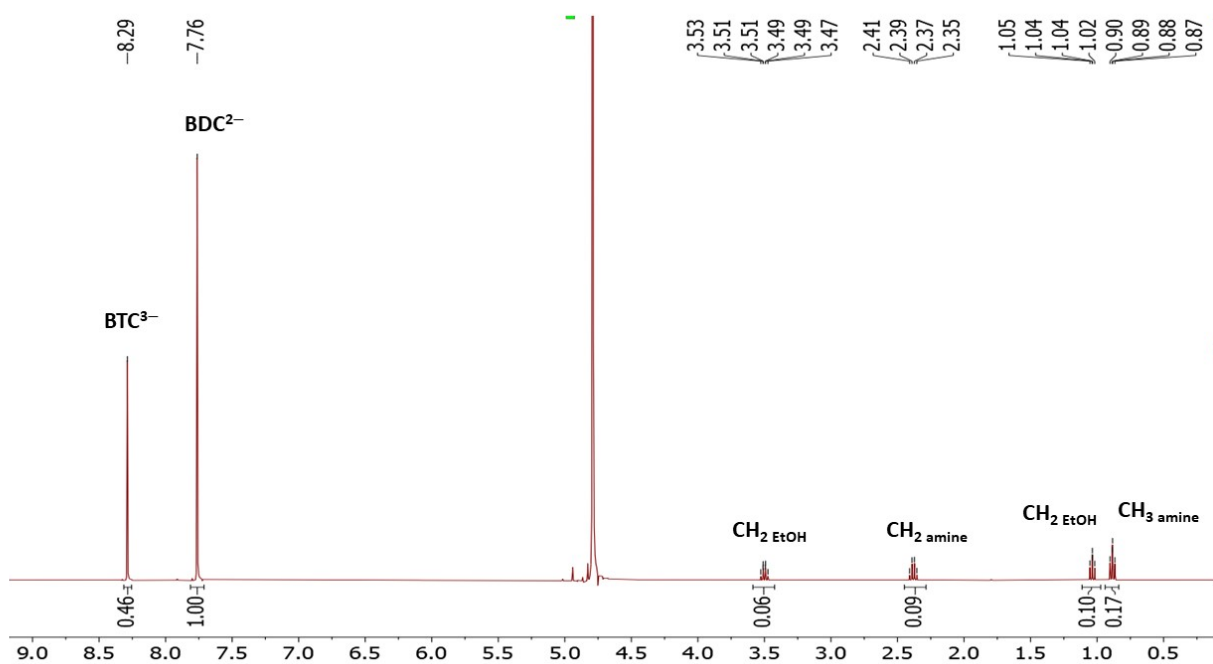

**Figure S23:**  $^1\text{H}$  NMR spectrum of **CuCBM\_DMF-P-sl** after digestion, using fumaric acid as internal standard.  $\text{BTC}^{3-}$  = 1,3,5-benzetricarboxylate anion;  $\text{BDC}^{2-}$  = 1,4-benzenedicarboxylate anion.

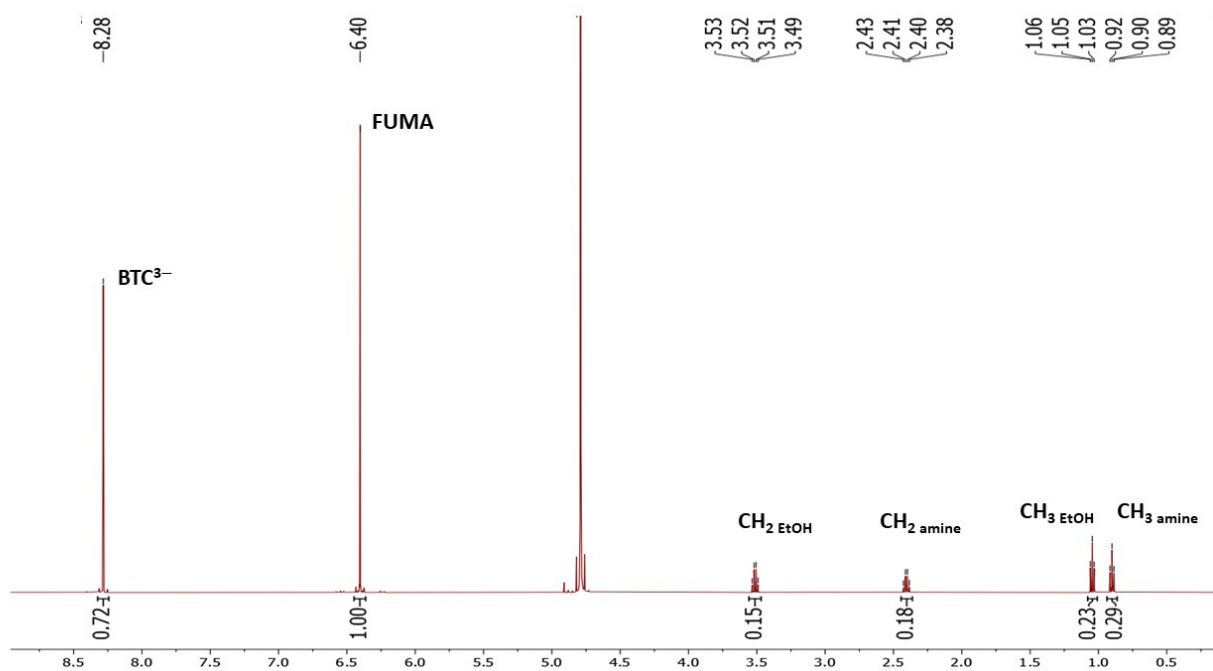

**Figure S24:**  $^1\text{H}$  NMR spectrum of **CuCBM\_EtOH-P-sl** after digestion, using fumaric acid as internal standard.  $\text{BTC}^{3-}$  = 1,3,5-benzetricarboxylate anion; FUMA = fumaric acid.

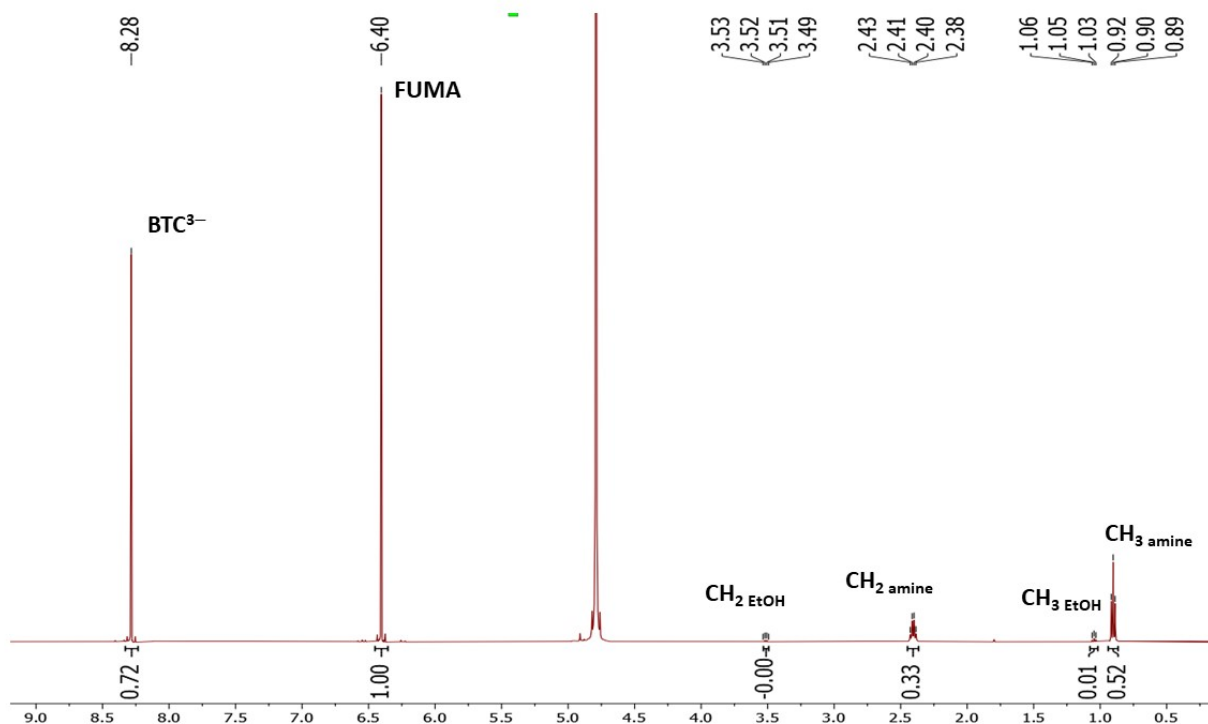

**Figure S25:**  $^1\text{H}$  NMR spectrum of  $\text{CuCl}_2/\text{NHEt}_2/\text{CO}_2\text{-DMF-P-sl-6eq}$  after digestion, using fumaric acid as internal standard.  $\text{BTC}^{3-}$  = 1,3,5-benzetricarboxylate anion; FUMA = fumaric acid.

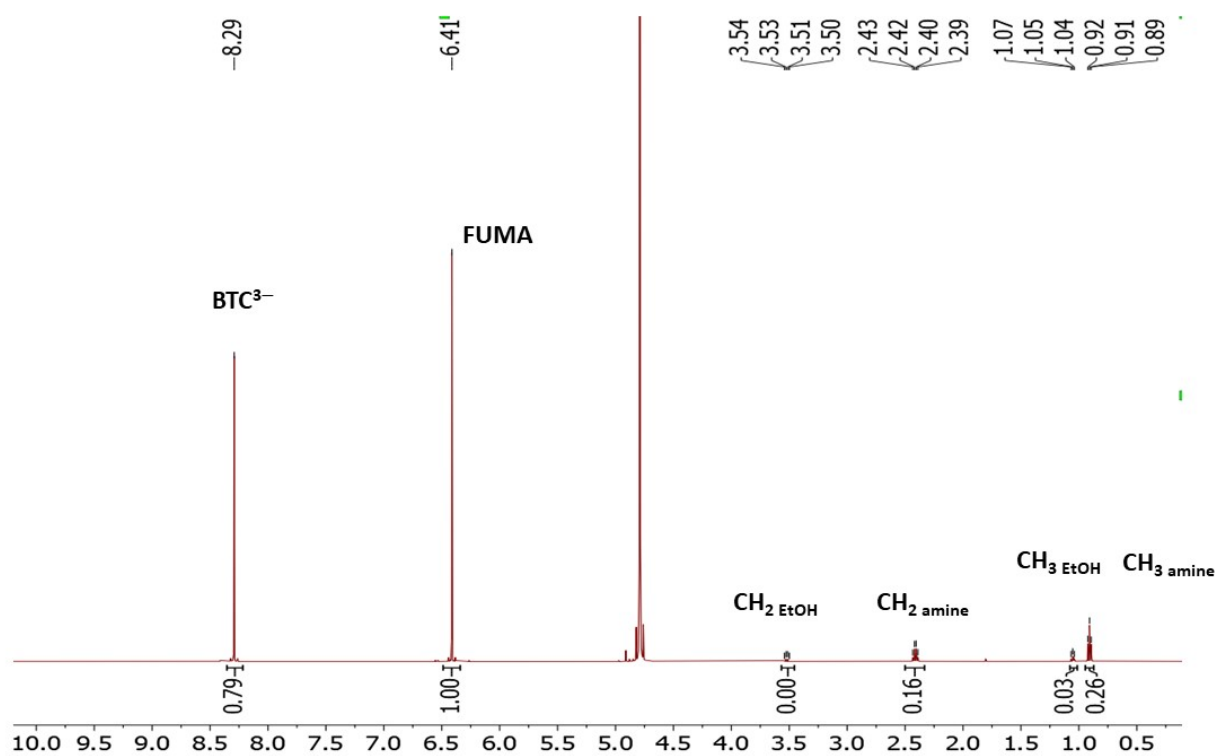

**Figure**

**S26:**  $^1\text{H}$  NMR spectrum of  $\text{CuCl}_2/\text{NHEt}_2/\text{CO}_2\text{-EtOH-P-sl-6eq}$  after digestion, using fumaric acid as internal standard.  $\text{BTC}^{3-}$  = 1,3,5-benzetricarboxylate anion; FUMA = fumaric acid.

## Elemental Analysis

### Sample preparation

About 2 mg of solid was introduced into a tin boat for elemental analysis and kept at 120 °C for two hours. Afterwards, the boat was closed while still hot and weighed to determine the mass of the desolvated solid to analyse.

**Table S8:** Calculated and experimental elemental analysis. Calculated percentages are based on the hypothetical formula based on <sup>1</sup>H-NMR spectra.

| Sample                                                                   | %C<br>exp | %H<br>exp | %N<br>exp | Hypothetical Formula                                                                           | %C<br>calc | %H<br>calc | %N<br>calc |
|--------------------------------------------------------------------------|-----------|-----------|-----------|------------------------------------------------------------------------------------------------|------------|------------|------------|
| CuOAc_DMF-P-T140-s                                                       | 37.17     | 3.99      | 5.13      | Cu <sub>3</sub> (BTC) <sub>2</sub> (DMF) <sub>3.30</sub>                                       | 39.50      | 3.42       | 5.40       |
| CuCBM_DMF-P-sl                                                           | 40.34     | 3.02      | 3.28      | Cu <sub>3</sub> (BTC) <sub>2</sub> (NH <sub>2</sub> Et) <sub>0.96</sub> (EtOH) <sub>0.85</sub> | 39.58      | 3.06       | 1.88       |
| CuCBM_EtOH-P-sl                                                          | 36.61     | 2.00      | 1.04      | Cu <sub>3</sub> (BTC) <sub>2</sub> (NH <sub>2</sub> Et) <sub>0.40</sub> (EtOH) <sub>0.60</sub> | 37.75      | 2.13       | 0.85       |
| CuCl <sub>2</sub> /NH <sub>2</sub> Et/CO <sub>2</sub> _DMF-P-sl-<br>6eq  | 38.03     | 2.47      | 1.84      | Cu <sub>3</sub> (BTC) <sub>2</sub> (NH <sub>2</sub> Et) <sub>0.70</sub> (EtOH) <sub>0.04</sub> | 38.12      | 2.13       | 1.49       |
| CuCl <sub>2</sub> /NH <sub>2</sub> Et/CO <sub>2</sub> _EtOH-P-sl-<br>6eq | 35.67     | 1.92      | 0.90      | Cu <sub>3</sub> (BTC) <sub>2</sub> (NH <sub>2</sub> Et) <sub>0.32</sub> (EtOH) <sub>0.07</sub> | 36.93      | 1.59       | 0.71       |

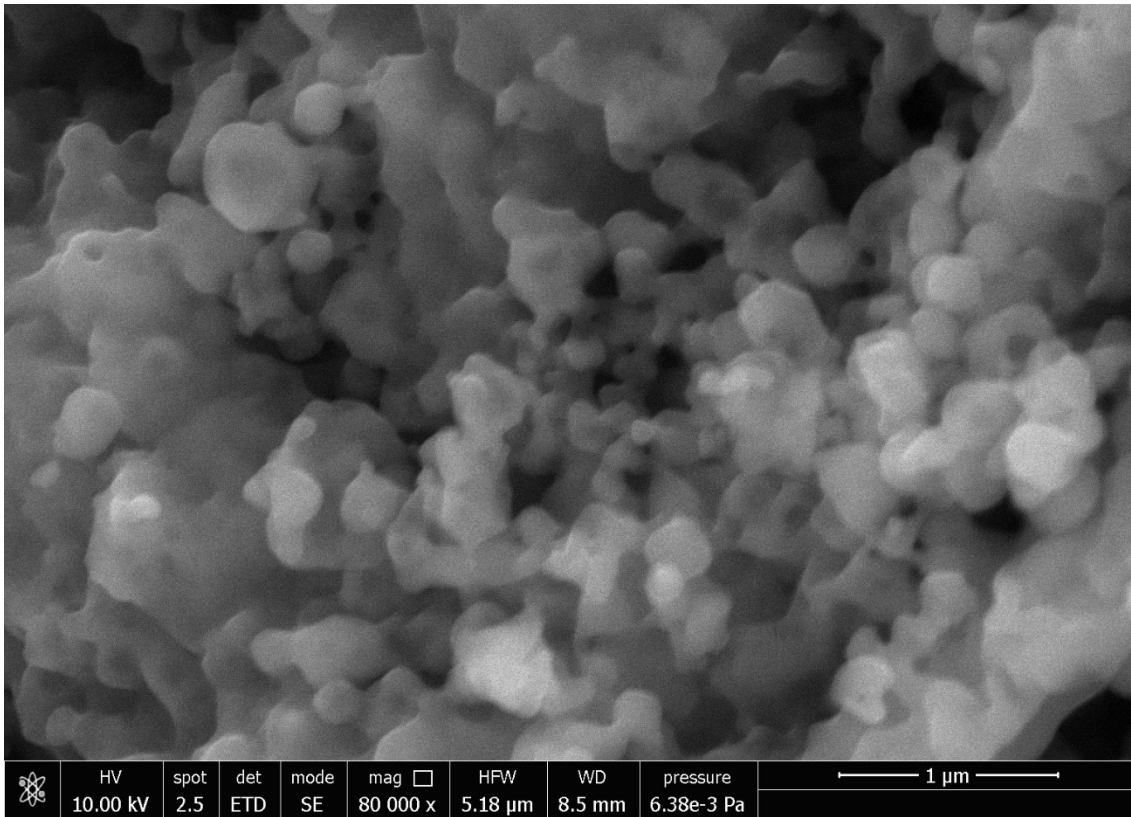

Figure S27: SEM image of CuCBM\_DMF-P-sl.

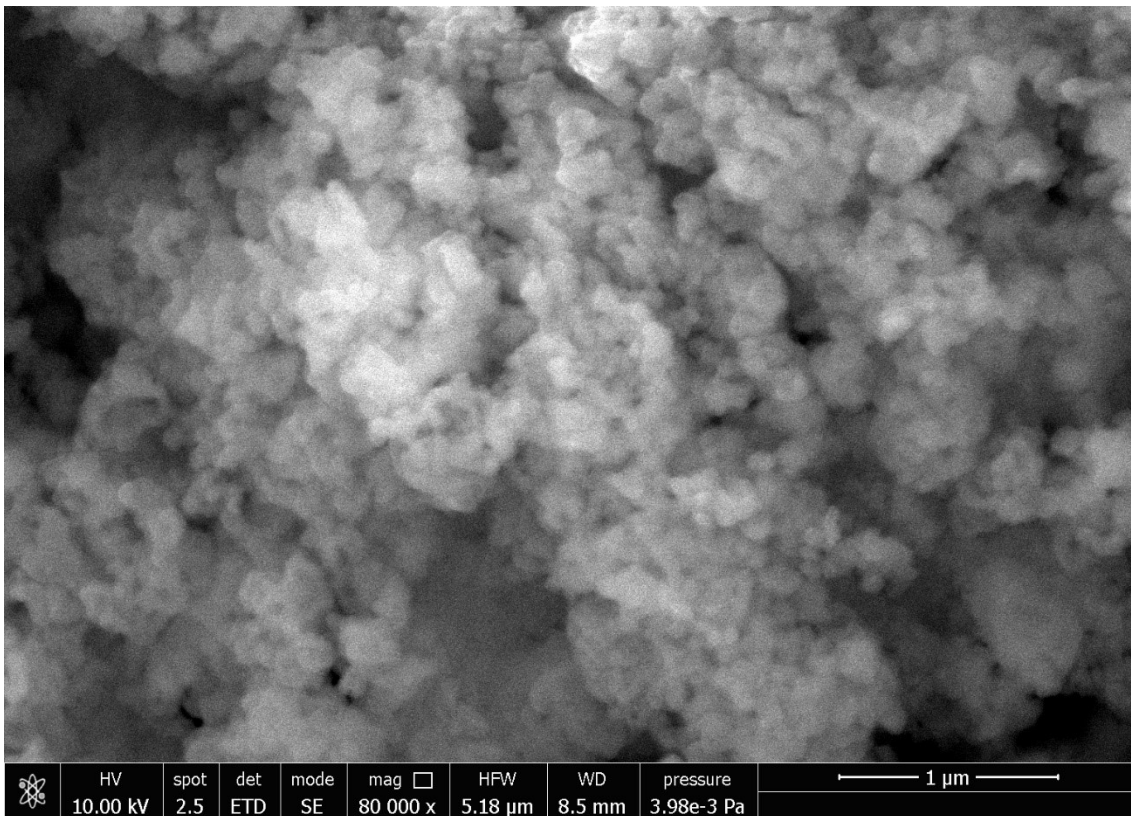

Figure S28: SEM image of CuCBM\_EtOH-P-sl.

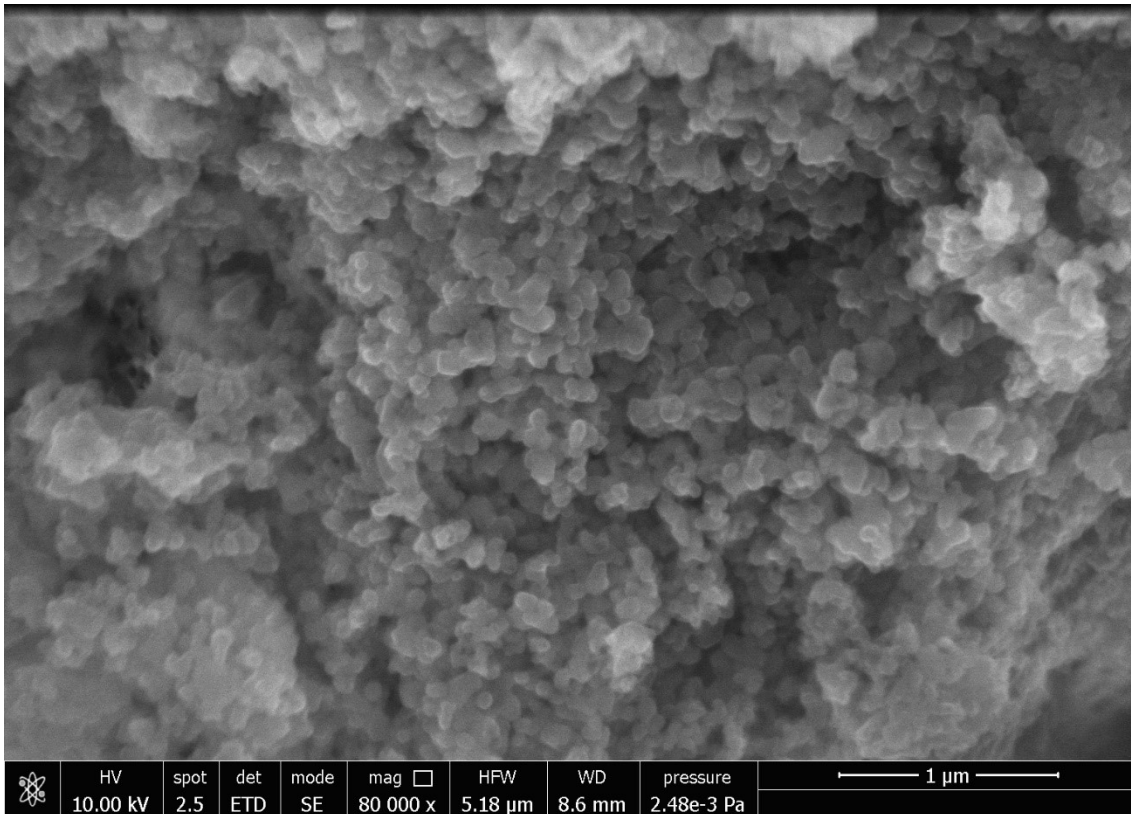

Figure S29: SEM image of CuOAc\_DMF-P-T140-s.

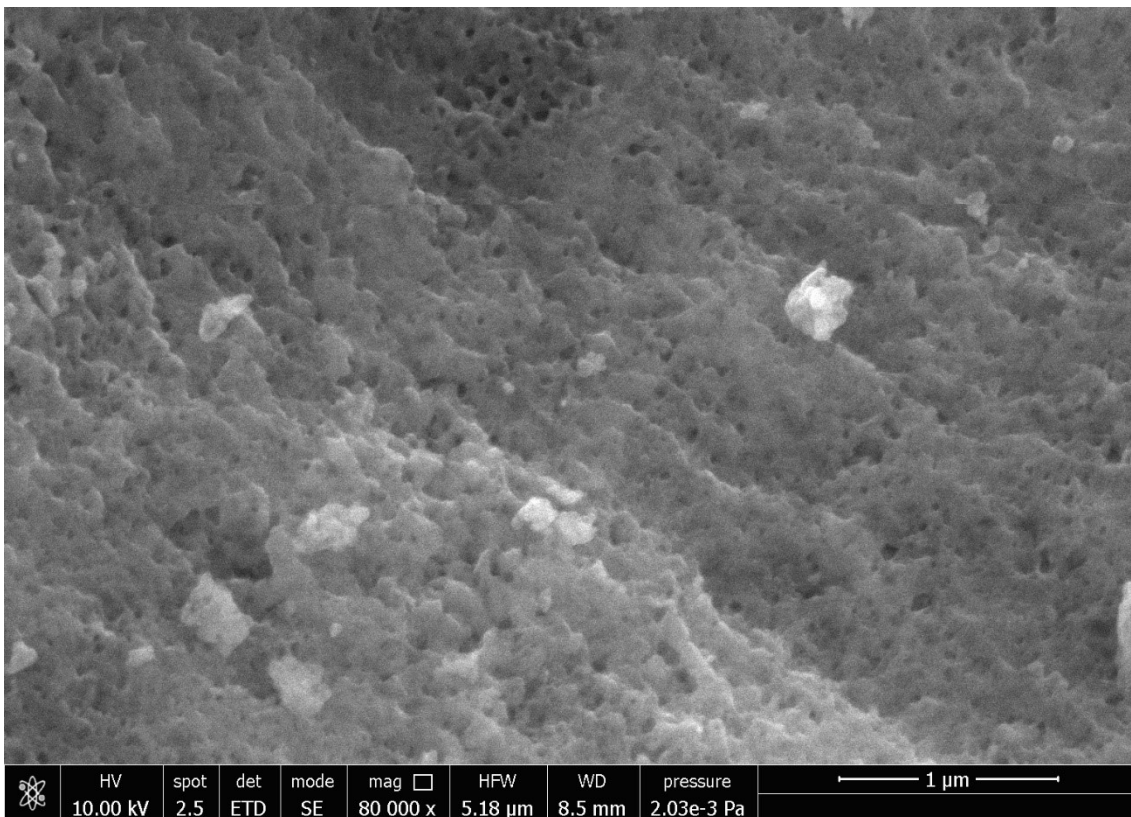

Figure S30: SEM image of CuCl<sub>2</sub>/NH<sub>4</sub>Et<sub>2</sub>/CO<sub>2</sub>\_EtOH-P-sl-6eq.



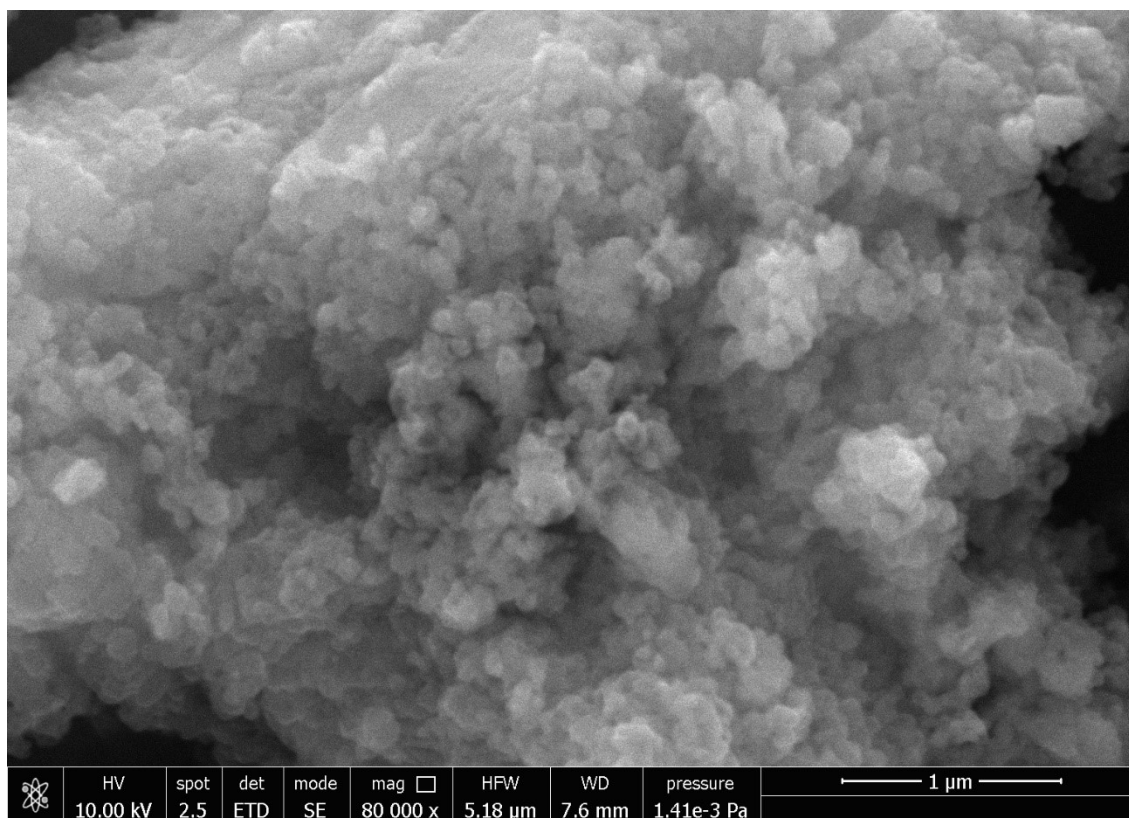

**Figure S31:** SEM image of  $\text{CuCl}_2/\text{NH}_4\text{Et}_2/\text{CO}_2\text{-DMF-P-sl-6eq}$ .

**Table S9:**  $\text{N}_2$  sorption results for selected HKUST-1 samples.

| Entry | Sample name                                                             | Surface Area<br>( $\text{m}^2 \text{g}^{-1}$ ) |
|-------|-------------------------------------------------------------------------|------------------------------------------------|
| 1     | CuOAc_DMF-P-T140-s                                                      | 933                                            |
| 2     | CuCBM_DMF-P-sl                                                          | 543                                            |
| 3     | CuCBM_EtOH-P-sl                                                         | 1010                                           |
| 4     | $\text{CuCl}_2/\text{NH}_4\text{Et}_2/\text{CO}_2\text{-DMF-P-sl-6eq}$  | 745                                            |
| 5     | $\text{CuCl}_2/\text{NH}_4\text{Et}_2/\text{CO}_2\text{-EtOH-P-sl-6eq}$ | 1012                                           |

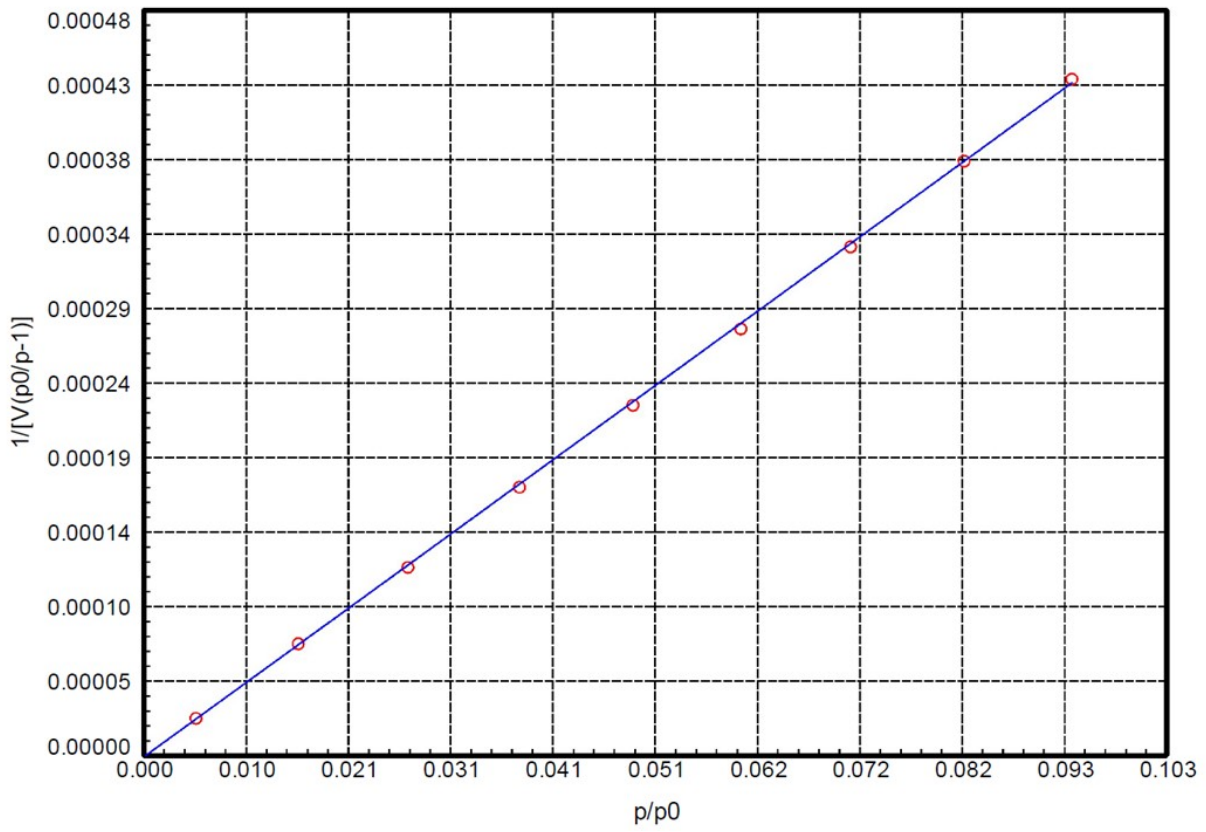

Figur

e S32: BET plot of CuOAc\_DMF-P-T140-s.

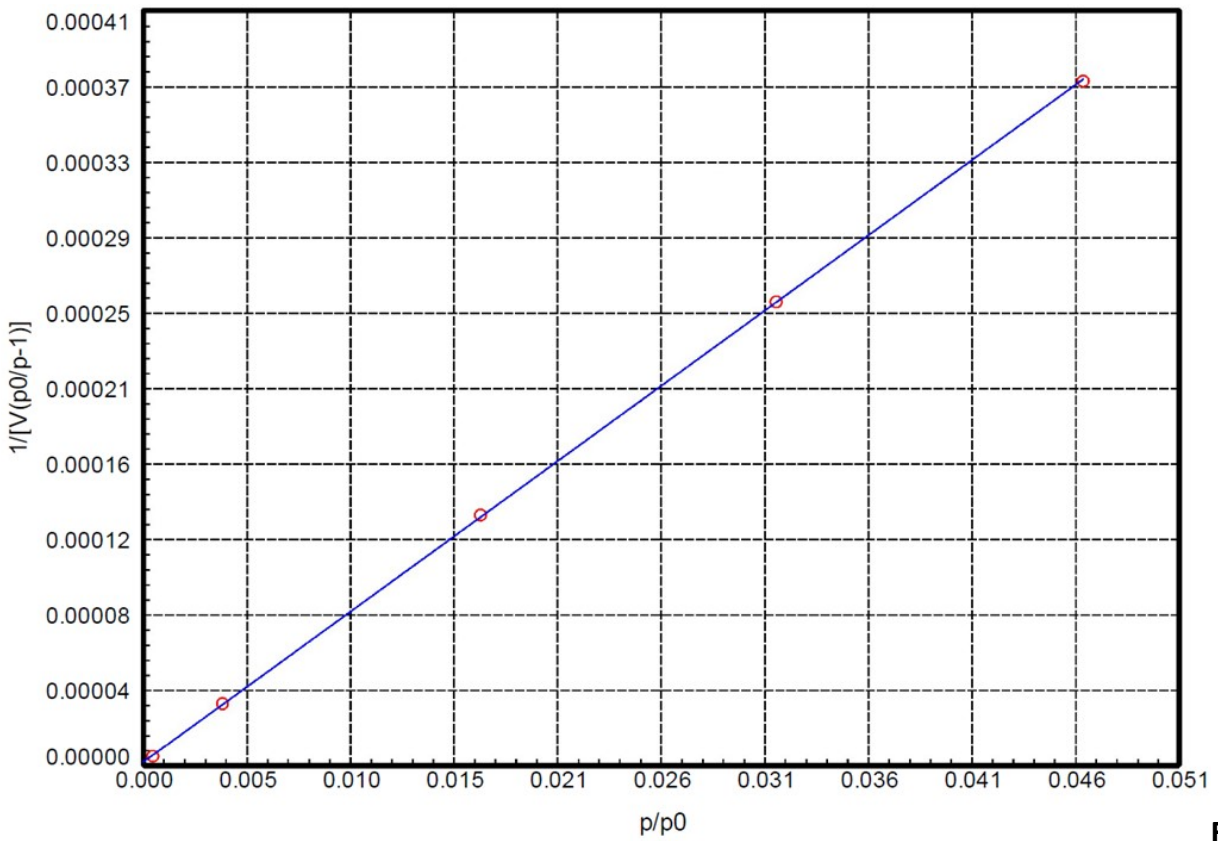

Figur

e S33: BET plot of CuCBM\_DMF-P-sl.

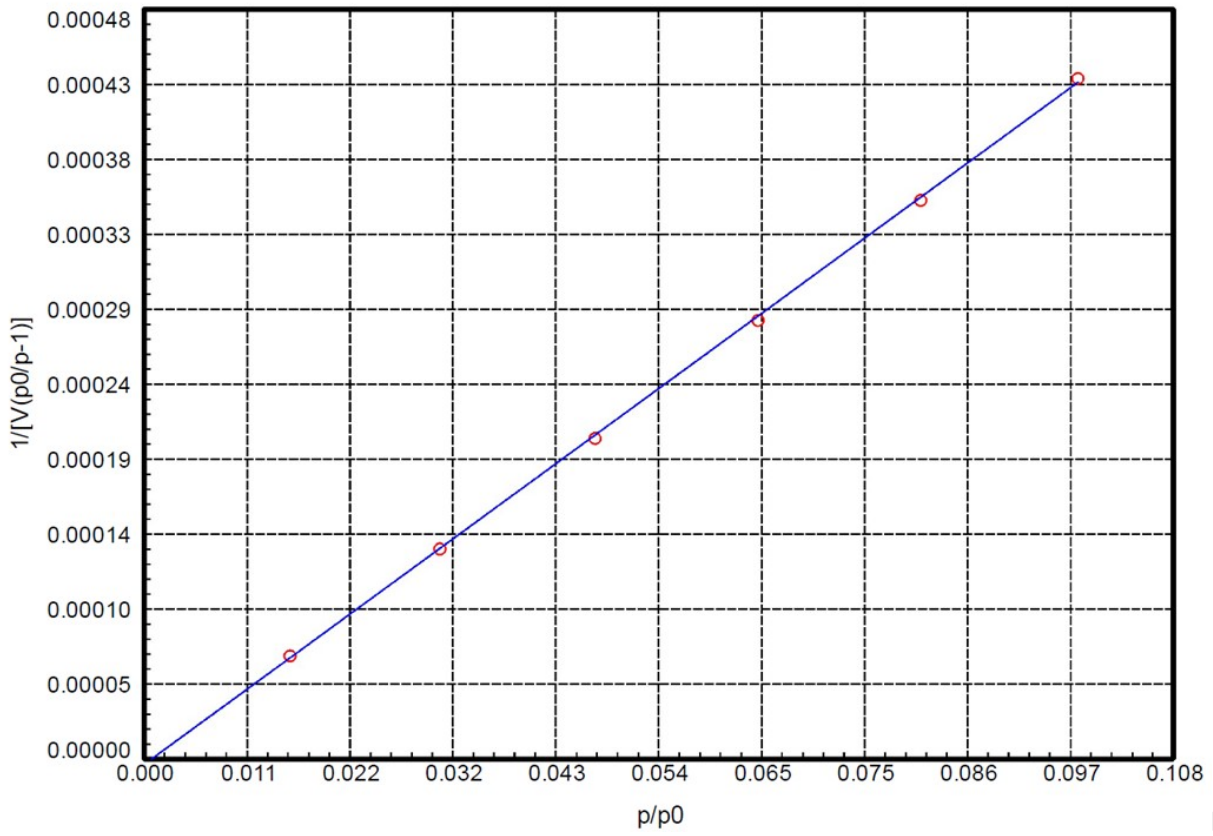

Figur

e S34: BET plot of CuCBM\_EtOH-P-sl.

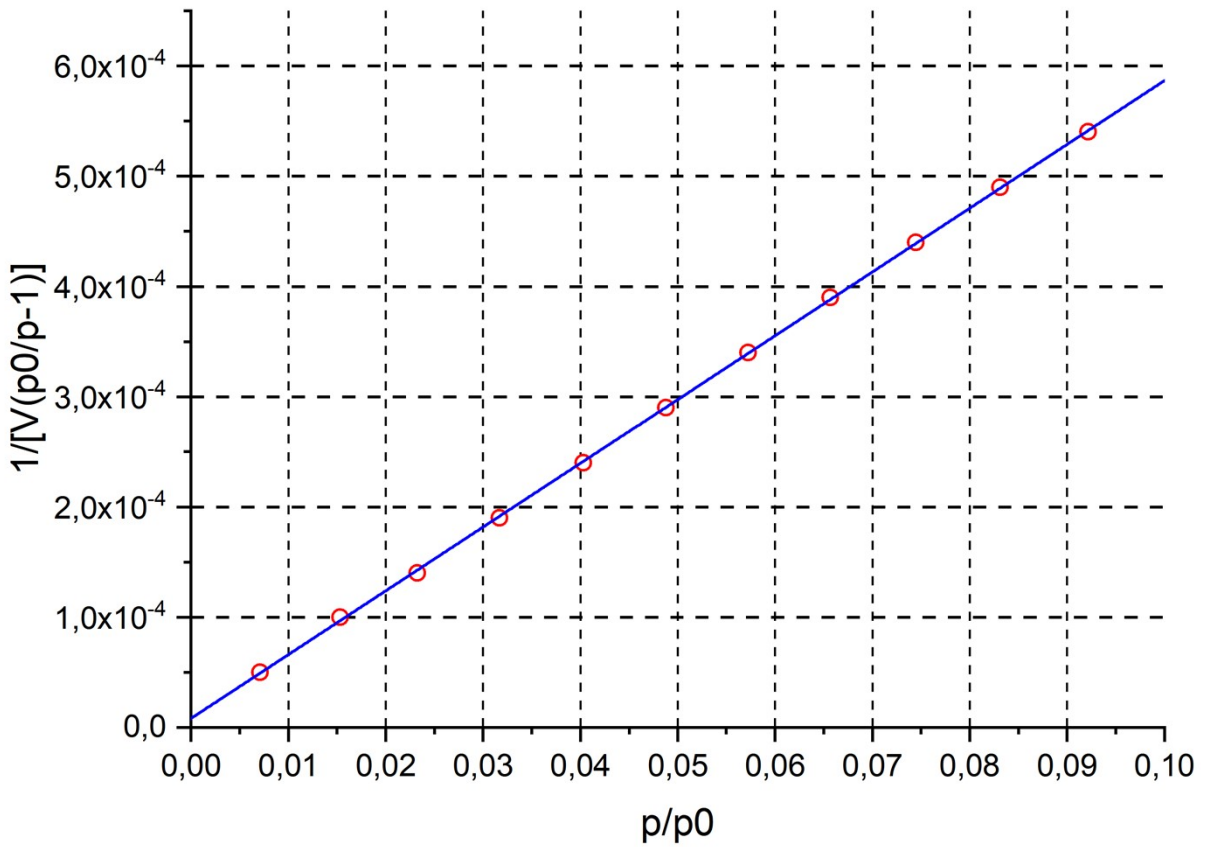

Figure S35: BET plot of CuCl<sub>2</sub>/NHEt<sub>2</sub>/CO<sub>2</sub>\_DMF-P-sl-6eq.

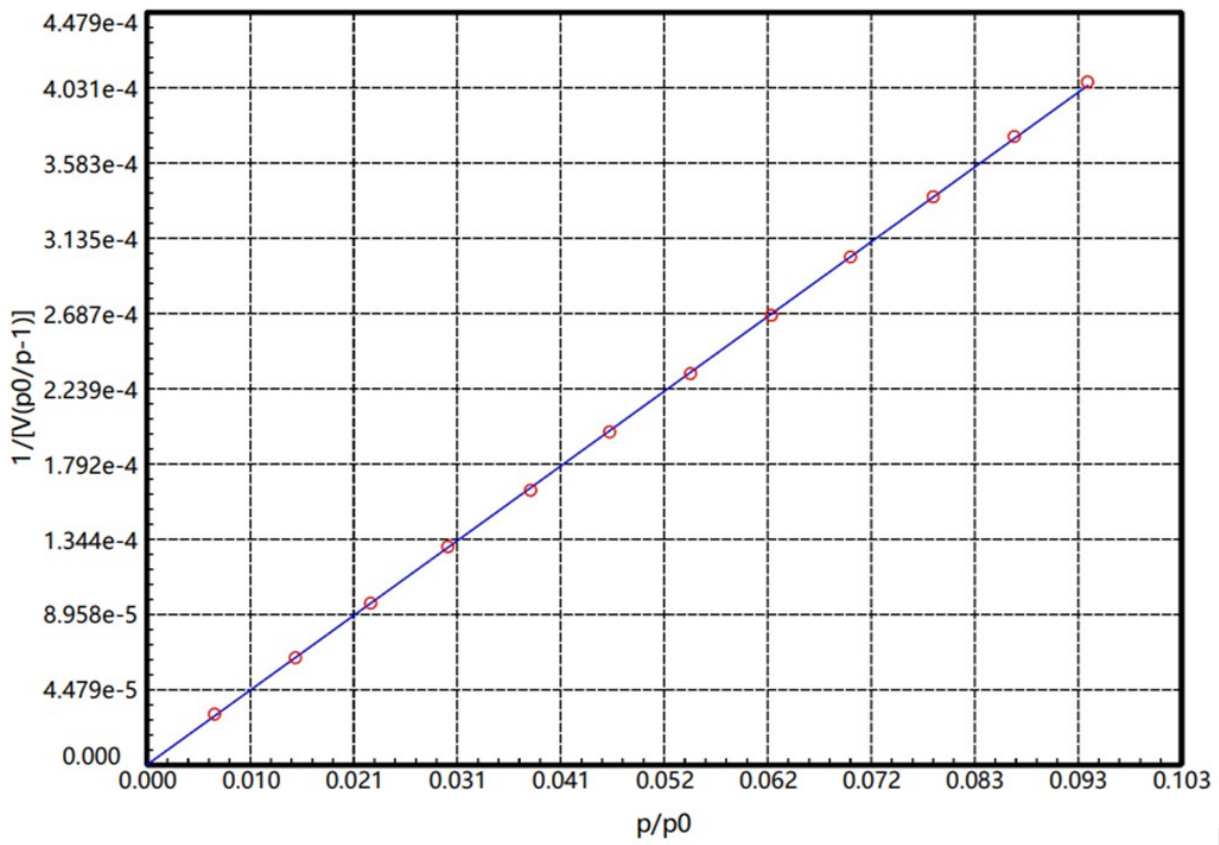

Figur

e S36: BET plot of  $\text{CuCl}_2/\text{NH}_4\text{Cl}/\text{CO}_2\text{-EtOH-P-sl-6eq.}$

**Table S10:** Comparison of the room temperature synthesis of HKUST-1 starting from **CuCBM** with room temperature methods starting from other metal precursors reported in the literature.

| Metal precursor                                        | Solvent                       | Linker/metal ratio | Reaction time (h) | Yield (%)         | BET Area (m <sup>2</sup> g <sup>-1</sup> ) | Notes                                                                                      | Ref.      |
|--------------------------------------------------------|-------------------------------|--------------------|-------------------|-------------------|--------------------------------------------|--------------------------------------------------------------------------------------------|-----------|
| <b>CuCBM</b>                                           | EtOH                          | 1:1                | 24                | 98 <sup>[a]</sup> | 1010                                       | Linker solution added dropwise (2 mL h <sup>-1</sup> )                                     | This work |
| Cu(NO <sub>3</sub> ) <sub>2</sub> ·3H <sub>2</sub> O   | EtOH/H <sub>2</sub> O         | 1:1                | 0                 | n.a.              | 940                                        | Addition of diethylamine (amine/linker ratio = 3:1)                                        | 1         |
| Cu(NO <sub>3</sub> ) <sub>2</sub> ·3H <sub>2</sub> O   | MeOH/H <sub>2</sub> O         | 1:1.8              | 30                | 96                | 1037                                       | Addition of <i>N,N,N,N</i> -tetramethyl-1,6-hexanediamine (amine/linker ratio = 2.7:1)     | 2         |
| Cu(OAc) <sub>2</sub> ·H <sub>2</sub> O                 | H <sub>2</sub> O              | 2:1                | 24                | n.a.              | 471                                        | Cu solution added dropwise (25 mL h <sup>-1</sup> )                                        | 3         |
| CuCl <sub>2</sub>                                      | H <sub>2</sub> O/ionic liquid | 1:1.5              | 0.5               | 96                | 1484                                       | Ionic liquid is <i>N,N,N,N',N',N'</i> -hexakis(2-hydroxyethyl)ethane-1,2-diaminium bromide | 4         |
| Cu(NO <sub>3</sub> ) <sub>2</sub> ·3H <sub>2</sub> O   | MeOH/H <sub>2</sub> O         | 1:1.8              | 24                | n.a.              | 989                                        | Addition of 2-dimethylaminoethylamine (amine/Cu ratio = 2.7:1)                             | 5         |
| Cu(NO <sub>3</sub> ) <sub>2</sub> ·2.5H <sub>2</sub> O | H <sub>2</sub> O              | 1:1.5              | 0                 | 50                | 1372                                       | pH = 3.3                                                                                   | 6         |
| Cu(OAc) <sub>2</sub> ·H <sub>2</sub> O                 | H <sub>2</sub> O              | 2:1                | 1                 | 97                | 1376                                       | -                                                                                          | 7         |

<sup>[a]</sup>Calculated based on the proposed formula in Table S8.

**Table S11:** Syntheses conducted in DMF without modulator. The precursor is: **ZrCBM** = Zr(IV) *N,N*-diethylcarbamate; **ZrCl<sub>4</sub>** = Zirconium(IV) chloride. The linker is **P** = H<sub>2</sub>BDC; **D<sup>I</sup>**= HBDC<sup>-</sup> and **D<sup>II</sup>**=BDC<sup>2-</sup>. FWHM (Full width at half maximum) was evaluated for the 111 reflection located at 7.4 °2θ.

| Entry | Sample name                                  | NHEt <sub>2</sub> | T (°C) | Yield (mg) | FWHM (°) |
|-------|----------------------------------------------|-------------------|--------|------------|----------|
| 1     | ZrCl <sub>4</sub> _DMF-P-T120                | /                 | 120    | 134        | 0.20     |
| 2     | ZrCBM_DMF-P-T120                             | /                 | 120    | 80         | ---[a]   |
| 3     | ZrCBM_DMF-P                                  | /                 | 25     | 26         | ---[a]   |
| 4     | ZrCBM_DMF-D <sup>I</sup> -T120               | 1 eq              | 120    | 76         | ---[a]   |
| 5     | ZrCBM_DMF-D <sup>II</sup> -T120              | 2 eq              | 120    | 92         | ---[a]   |
| 6     | ZrCBM_EtOH-D <sup>II</sup> -T55              | 2 eq              | 55     | 27         | ---[a]   |
| 7     | ZrCl <sub>4</sub> _EtOH-D <sup>II</sup> -T55 | 2 eq              | 55     | 55         | ---[a]   |
| 8     | ZrCBM_MeOH-D <sup>II</sup> -T55              | 2 eq              | 55     | 68         | ---[a]   |
| 9     | ZrCl <sub>4</sub> _MeOH-D <sup>II</sup> -T55 | 2 eq              | 55     | 14         | ---[a]   |

[a]Amorphous product.

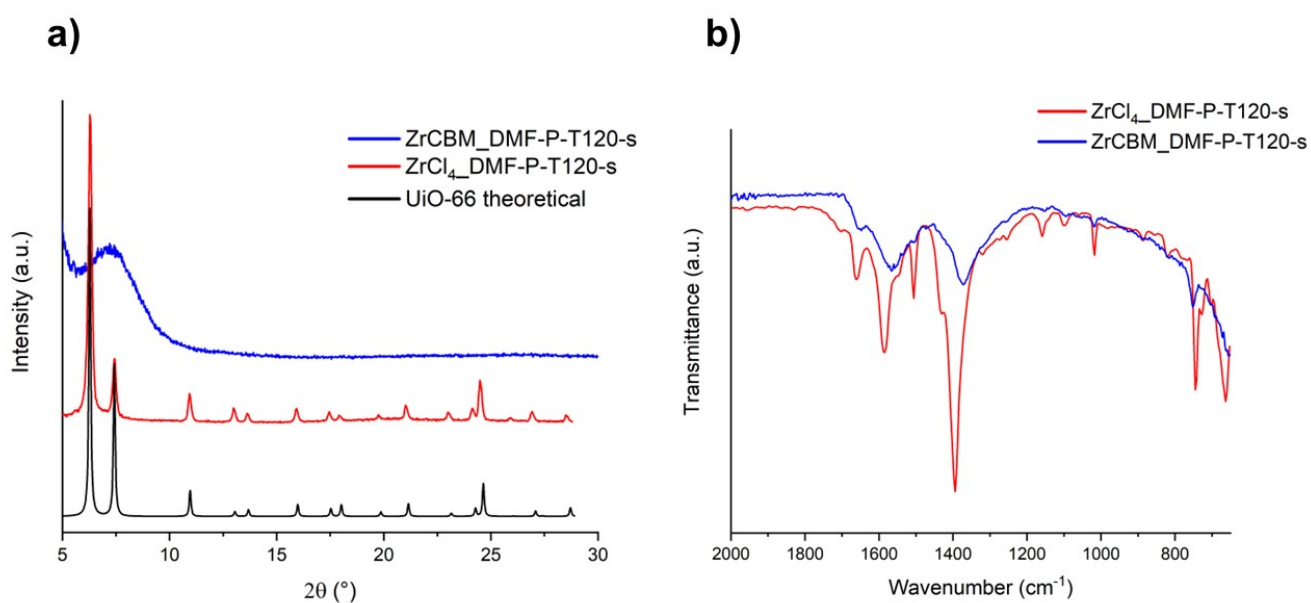

**Figure S37:** a) PXRD patterns of **ZrCBM\_DMF-P-T120-s** (blue line) and **ZrCl<sub>4</sub>\_DMF-P-T120-s** (red line) compared with UiO-66 theoretical pattern (black line). b) IR spectra of **ZrCBM\_DMF-P-T120-s** (blue line) and **ZrCl<sub>4</sub>\_DMF-P-T120-s** (red line).

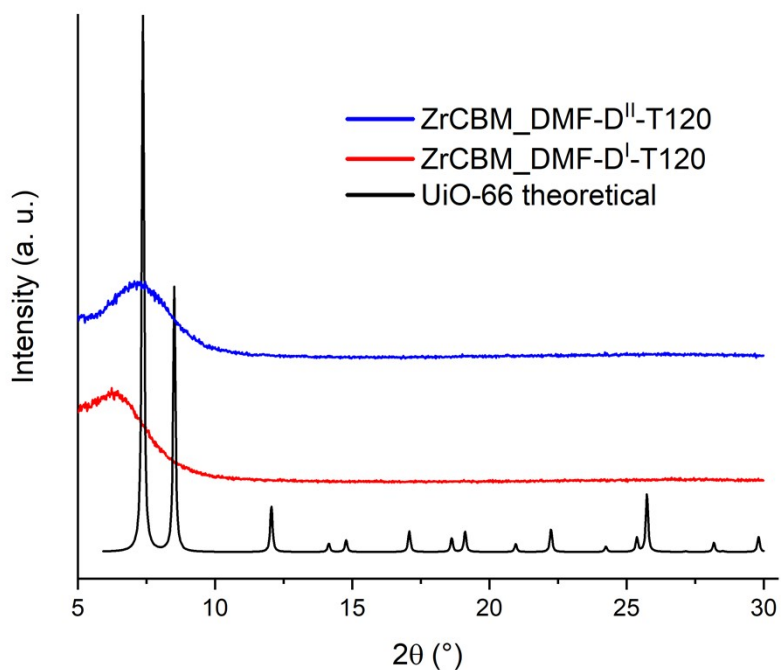

**Figure S38:** PXRD patterns of ZrCBM\_DMF-D<sup>II</sup>-s (blue line), ZrCBM\_DMF-D<sup>I</sup>-s (red line) compared with the theoretical one of UiO-66 (black line).

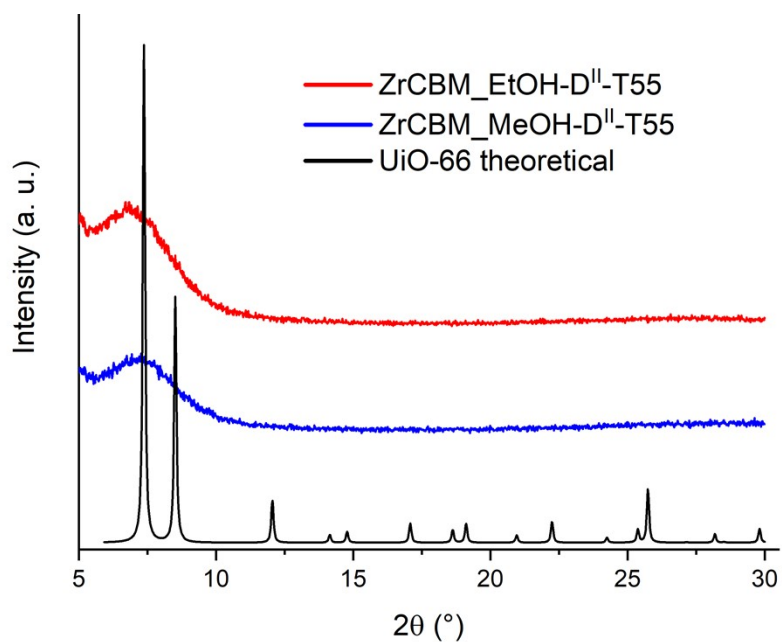

**Figure S39:** PXRD patterns of ZrCBM\_EtOH-D<sup>II</sup>-T55 (red line) and ZrCBM\_MeOH-D<sup>II</sup>-T55 (blue line) compared with the theoretical pattern of UiO-66 (black line).

**Table S12:** Syntheses conducted in DMF with formic acid as modulator. The precursors are: **ZrCBM** = Zr(IV) *N,N*-diethylcarbamate, **ZrCl<sub>4</sub>** = Zirconium(IV) chloride The linker is **P** = H<sub>2</sub>BDC. The symbol **@** was used when NHEt<sub>2</sub> was added into the system after the linker. The *m*(equivalents of modulator) is the molar ratio between FA and Zr. FWHM (Full width at half maximum) was evaluated for the 111 reflection located at 7.4 °2θ.

| Entry | Sample name                         | NHEt <sub>2</sub> (eq) | Mod (eq) | Yield (mg) | FWHM (°) |
|-------|-------------------------------------|------------------------|----------|------------|----------|
| 1     | ZrCBM_DMF-P-T120-m100               | /                      | 100      | 75         | 0.32     |
| 2     | ZrCBM_DMF-P-m100                    | /                      | 100      | 86         | 0.38     |
| 3     | ZrCl <sub>4</sub> _DMF-P-T120-m100@ | 4                      | 100      | 54         | 0.23     |
| 4     | ZrCl <sub>4</sub> _DMF-P-m100@      | 4                      | 100      | 70         | 0.84     |
| 5     | ZrCBM_DMF-P-t1-m100                 | /                      | 100      | 58         | 0.38     |
| 6     | ZrCBM_DMF-P-t3-m100                 | /                      | 100      | 71         | 0.39     |
| 7     | ZrCBM_DMF-P-m50                     | /                      | 50       | 86         | 0.94     |
| 8     | ZrCBM_DMF-P-m150                    | /                      | 150      | 95         | 0.22     |

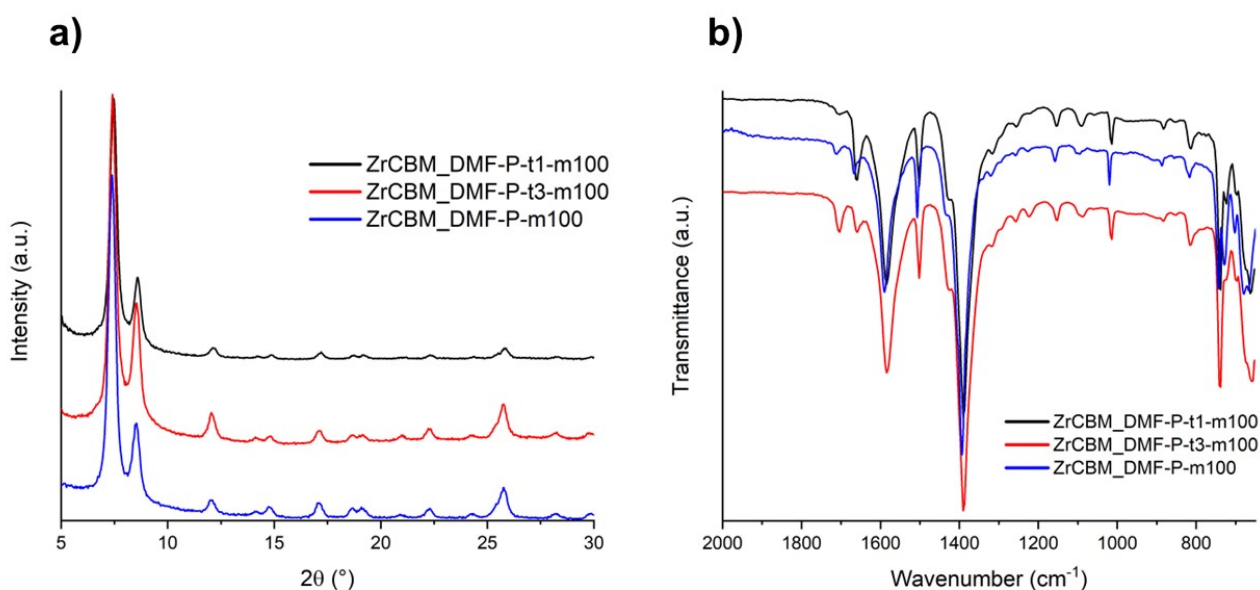

**Figure S40:** PXRD patterns (a) and IR spectra (b) of **ZrCBM\_DMF-P-t1-m100** (black line), **ZrCBM\_DMF-P-t3-m100** (red line), **ZrCBM\_DMF-P-m100** (blue line).



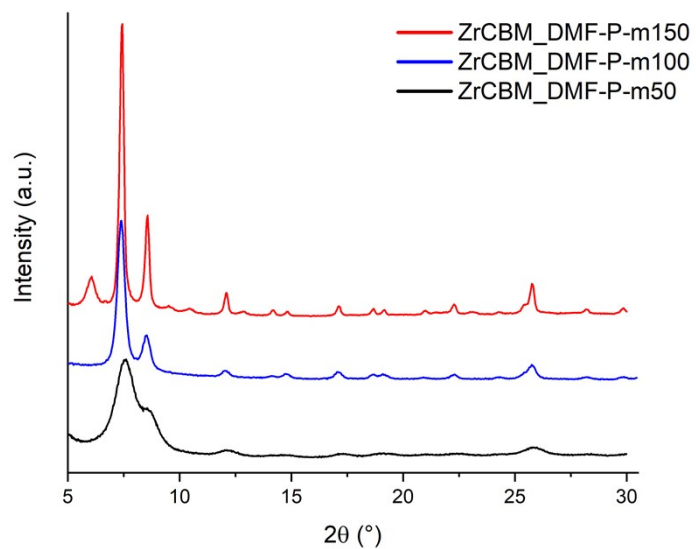

**Figure S41:** PXR D patterns of **ZrCBM\_DMF-P-m150** (red line), **ZrCBM\_DMF-P-m100** (blue line) and **ZrCBM\_DMF-P-m150** (black line).

**Table S13:** Theoretical and experimental percentage of BDC<sup>2-</sup> ligand for UiO-66 samples calculated by <sup>1</sup>H-NMR.

| Sample                                          | Hypothetical Formula                                                                                              | BDC <sup>2-</sup> theo (%) | BDC <sup>2-</sup> exp (%) |
|-------------------------------------------------|-------------------------------------------------------------------------------------------------------------------|----------------------------|---------------------------|
| ZrCBM_DMF-P-m100                                | Zr <sub>6</sub> O <sub>4</sub> (OH) <sub>4</sub> (BDC) <sub>4.25</sub> (FA) <sub>3.50</sub>                       | 45.8                       | 51.6                      |
| ZrCBM_DMF-P-T120-m100                           | Zr <sub>6</sub> O <sub>4</sub> (OH) <sub>4</sub> (BDC) <sub>5.02</sub> (FA) <sub>1.96</sub>                       | 51.8                       | 53.3                      |
| ZrCl <sub>4</sub> _DMF-P-m100 <sup>@</sup>      | Zr <sub>6</sub> O <sub>4</sub> (OH) <sub>4</sub> (BDC) <sub>3.91</sub> (FA) <sub>4.18</sub> (DEA) <sub>0.28</sub> | 41.9                       | 30.3                      |
| ZrCl <sub>4</sub> _DMF-P-T120-m100 <sup>@</sup> | Zr <sub>6</sub> O <sub>4</sub> (OH) <sub>4</sub> (BDC) <sub>4.80</sub> (FA) <sub>2.40</sub>                       | 50.0                       | 52.0                      |

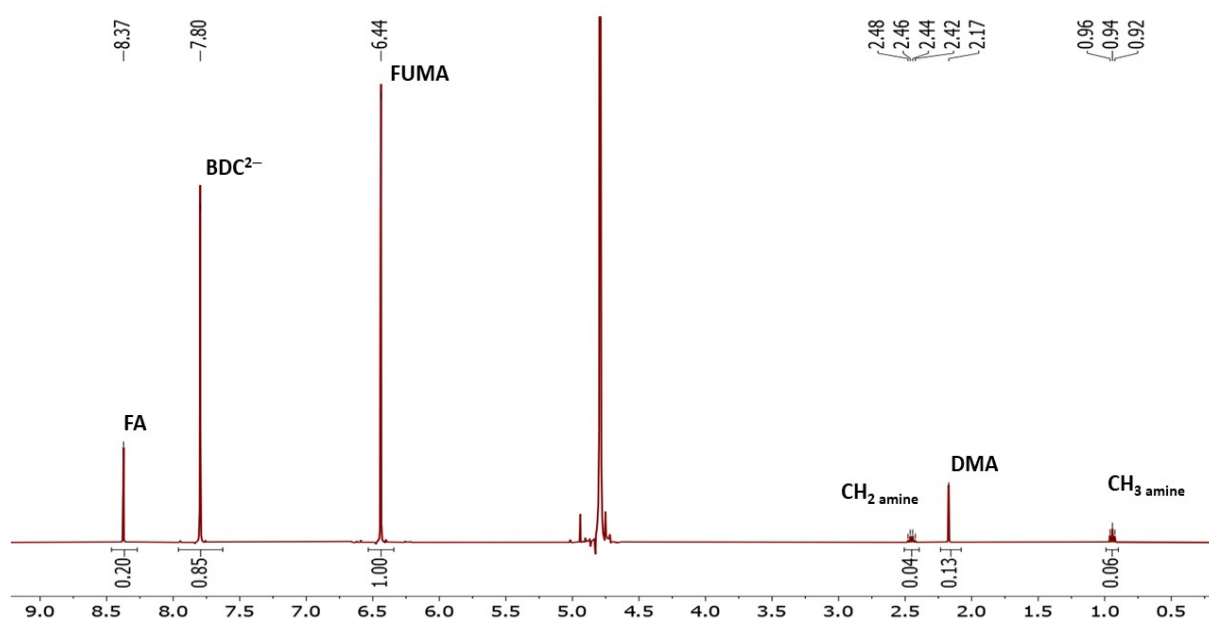

**Figur**

**e S42:** <sup>1</sup>H NMR spectrum of **ZrCBM\_DMF-P-m100** after digestion, using fumaric acid as internal standard. FA = formic acid; BDC<sup>2-</sup> = 1,4-benzenedicarboxylate anion; FUMA = fumaric acid; DMA = dimethylamine.

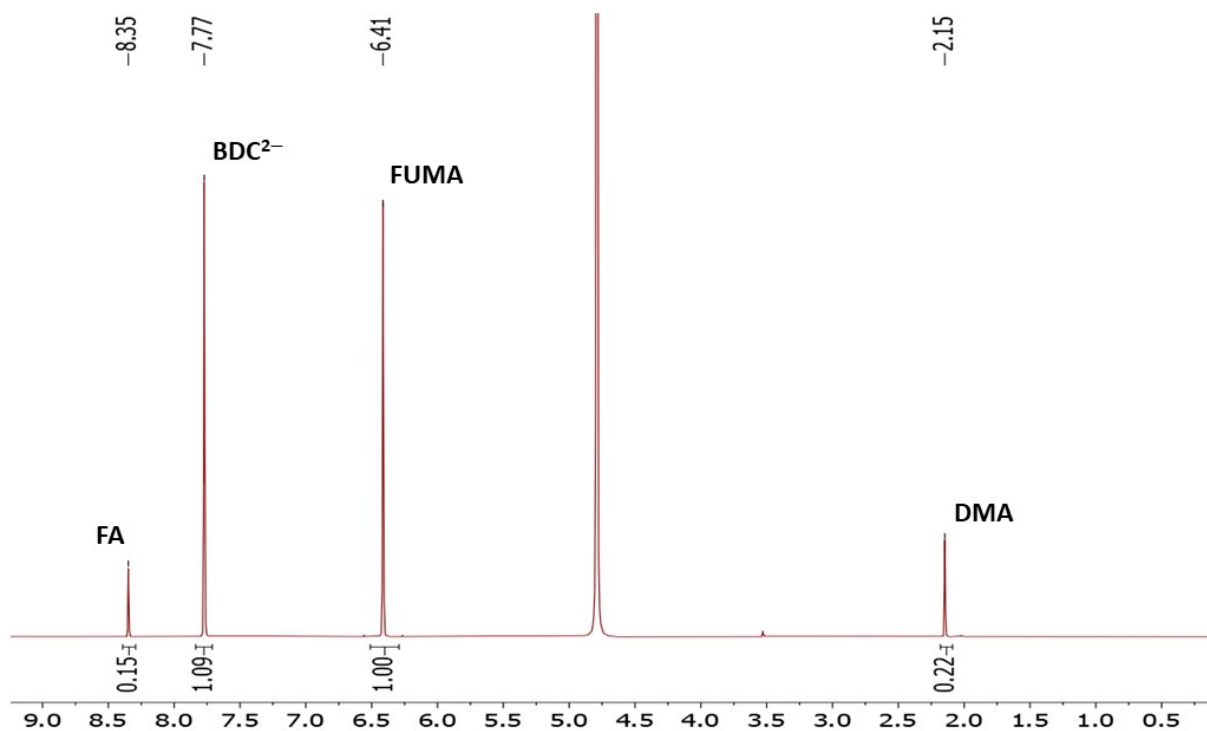

**Figure S43:** <sup>1</sup>H NMR spectrum of ZrCBM\_DMF-P-T120-m100 after digestion, using fumaric acid as internal standard. FA = formic acid; BDC<sup>2-</sup> = 1,4-benedicarboxylate anion; FUMA = fumaric acid; DMA = dimethylamine.

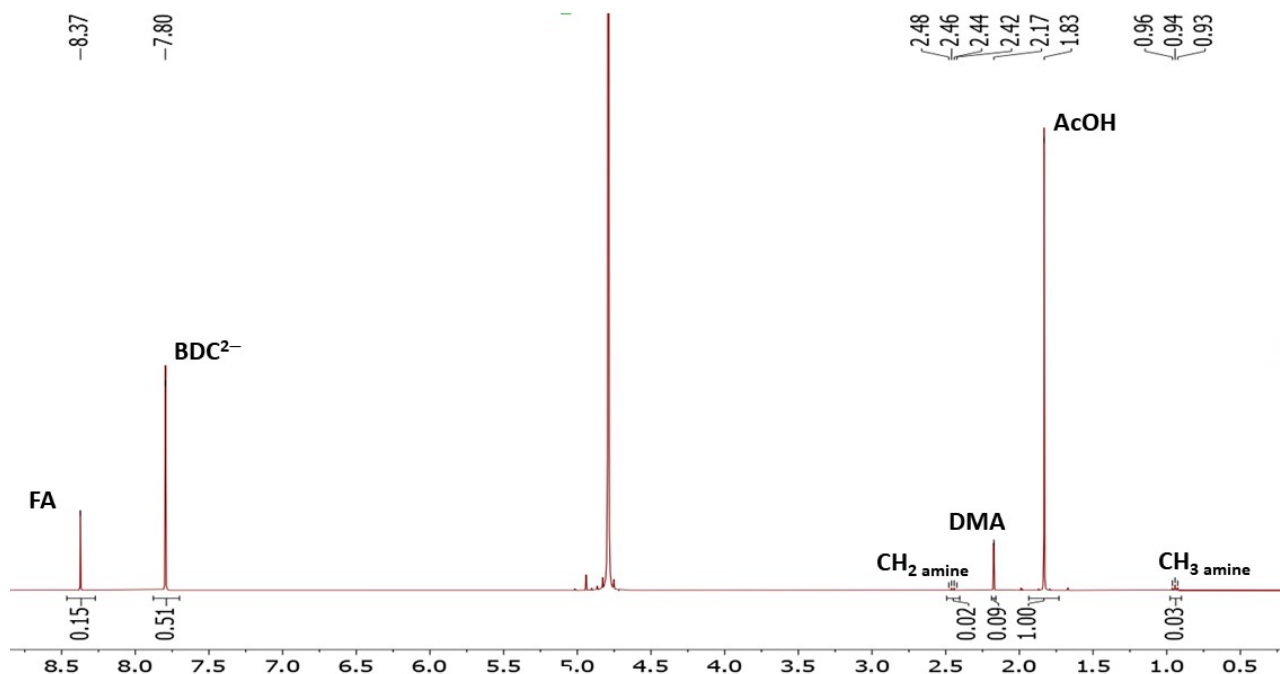

**Figure S44:** <sup>1</sup>H NMR spectrum of ZrCl<sub>4</sub>\_DMF-m100<sup>@</sup> after digestion, using acetic acid as internal standard. FA = formic acid; BDC<sup>2-</sup> = 1,4-benedicarboxylate anion; DMA = dimethylamine; AcOH = acetic acid.

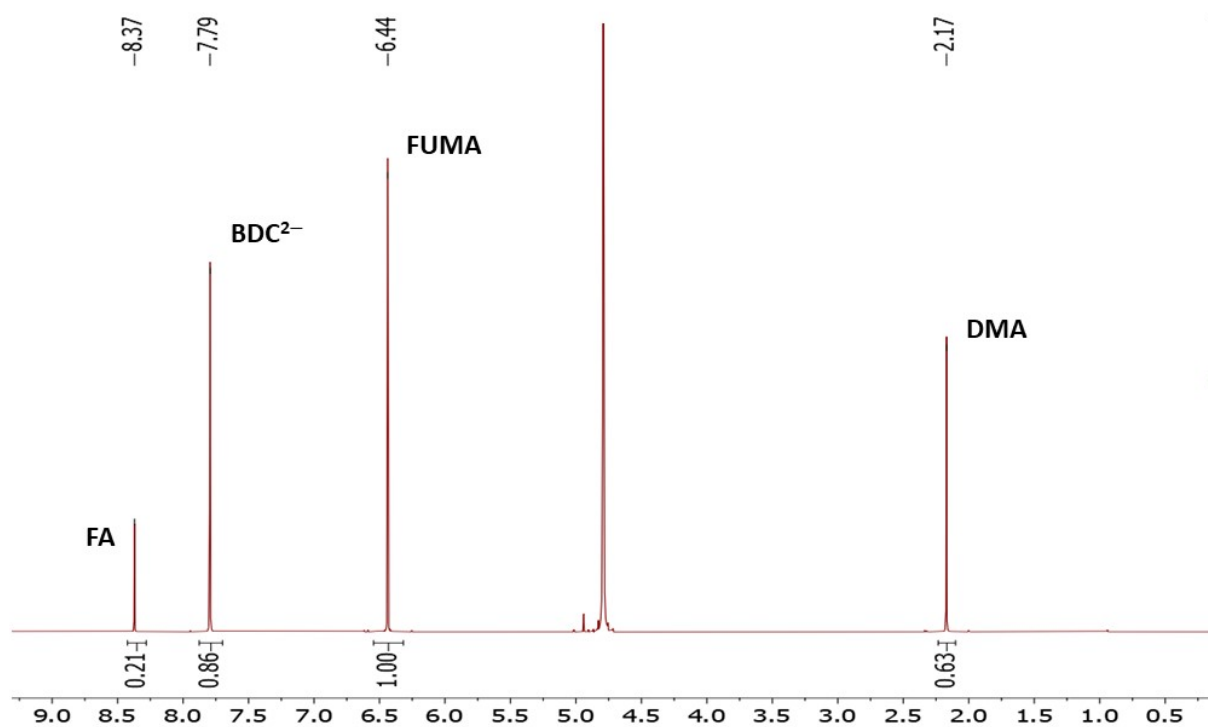

**Figure S45:** <sup>1</sup>H NMR spectrum of ZrCl<sub>4</sub>\_DMF-T120-m100<sup>@</sup> after digestion, using fumaric acid as internal standard. FA = formic acid; BDC<sup>2-</sup> = 1,4-benzenedicarboxylate anion; FUMA = fumaric acid; DMA = dimethylamine.

**Table S14:** N<sub>2</sub> sorption results of selected samples.

| Entry | Sample name                                   | Surface Area [m <sup>2</sup> /g] |
|-------|-----------------------------------------------|----------------------------------|
| 1     | ZrCBM_DMF-P-T120-m100                         | 941                              |
| 2     | ZrCBM_DMF-P-m100                              | 1138                             |
| 3     | ZrCl <sub>4</sub> _DMF-T120-m100 <sup>@</sup> | 1684                             |
| 4     | ZrCl <sub>4</sub> _DMF-P-m100 <sup>@</sup>    | 1100                             |

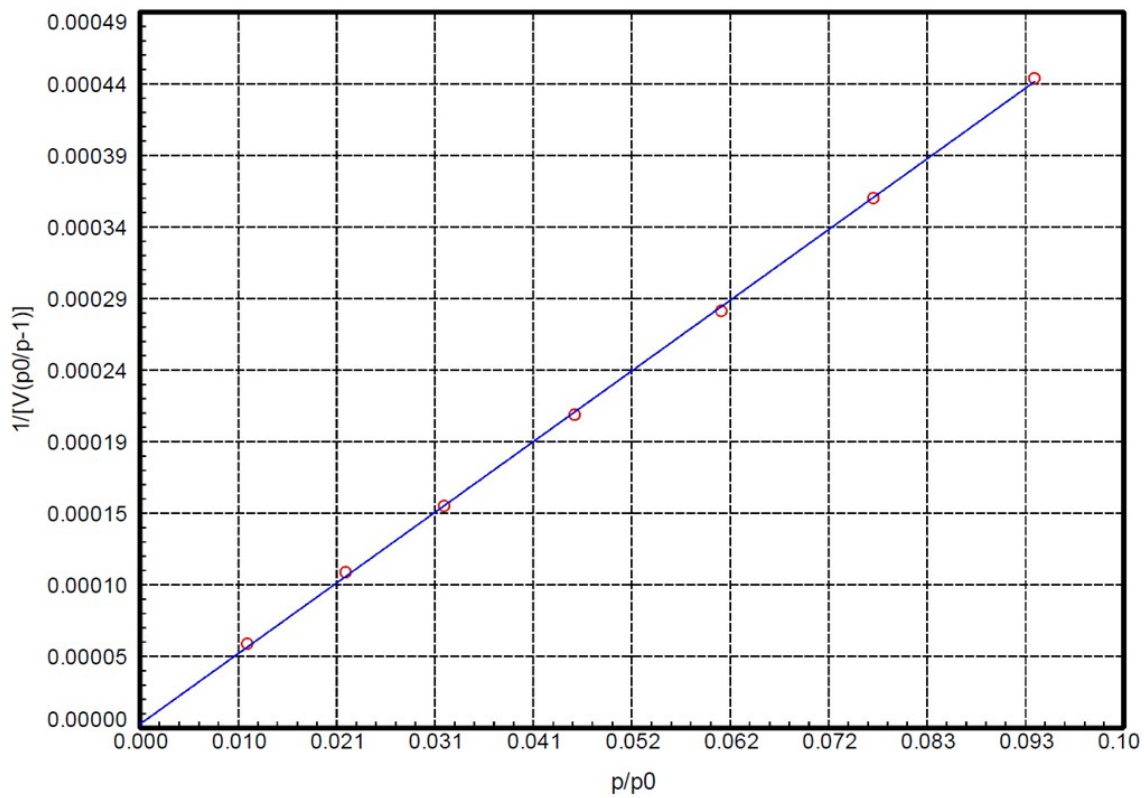

Figure S46: BET plot of ZrCBM\_DMF-P-T120-m100.

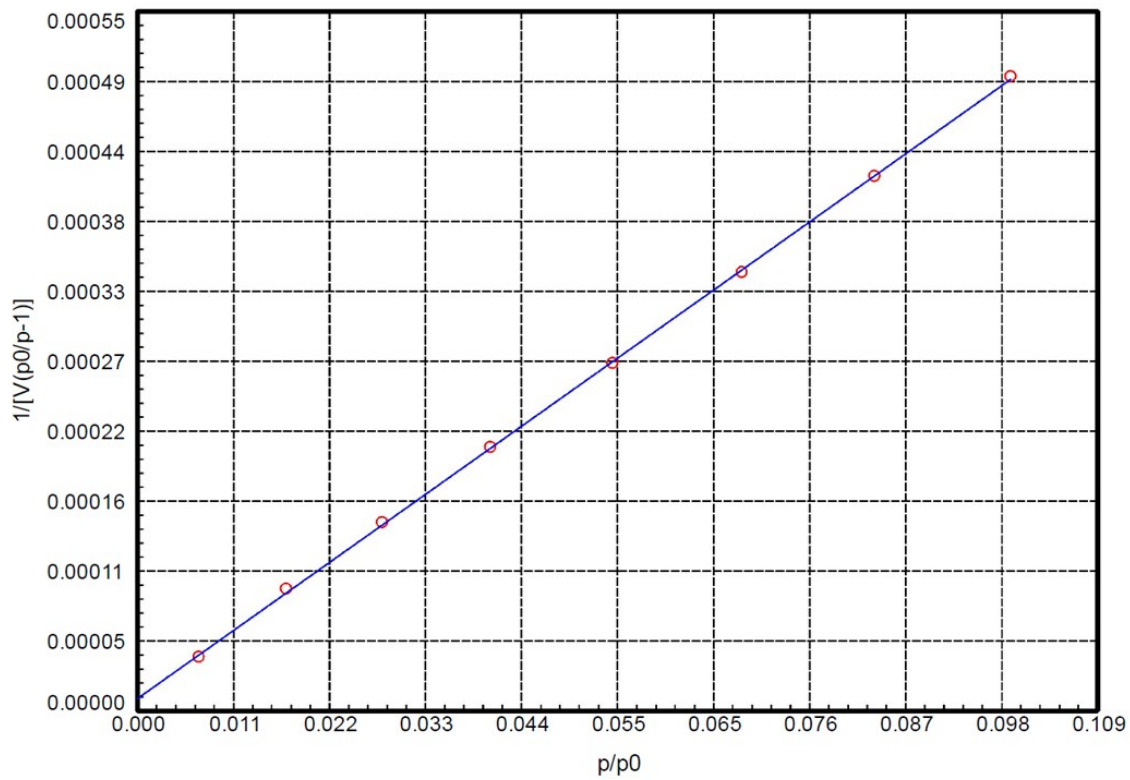

Figure S47: BET plot of ZrCBM\_DMF-P-m100.

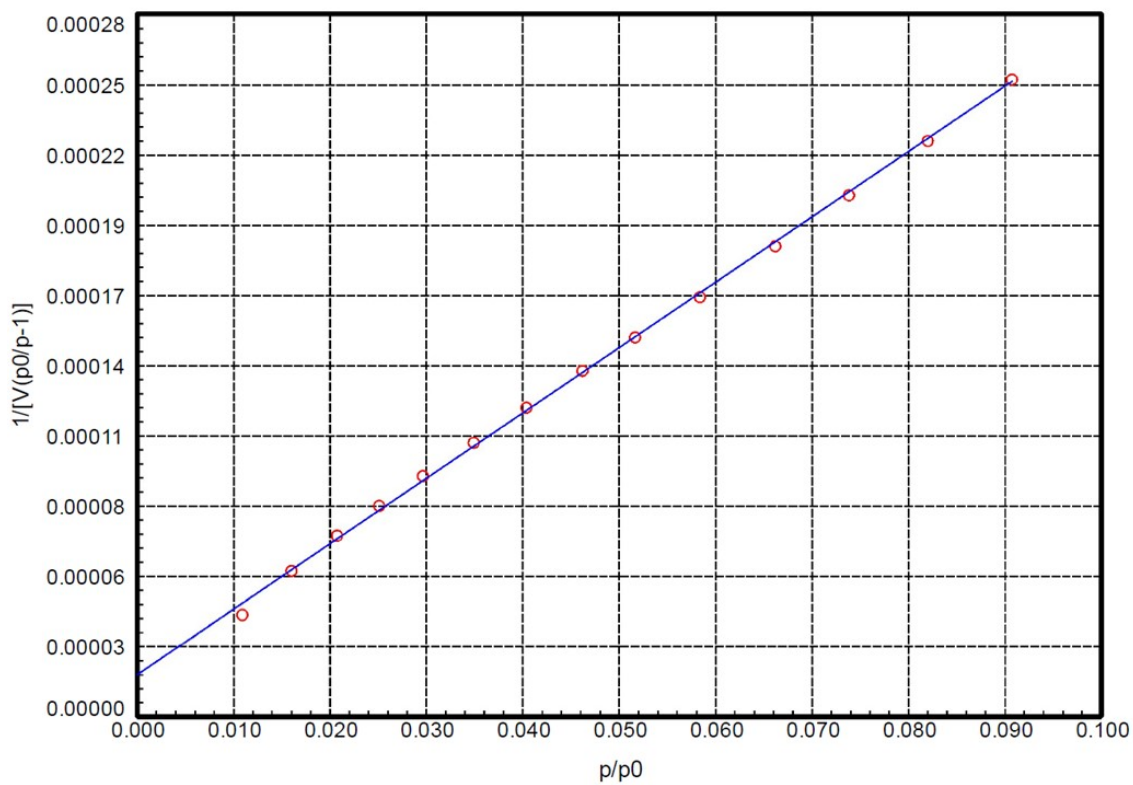

**Figure S48:** BET plot of  $ZrCl_4\_DMF-T120-m100@$ .

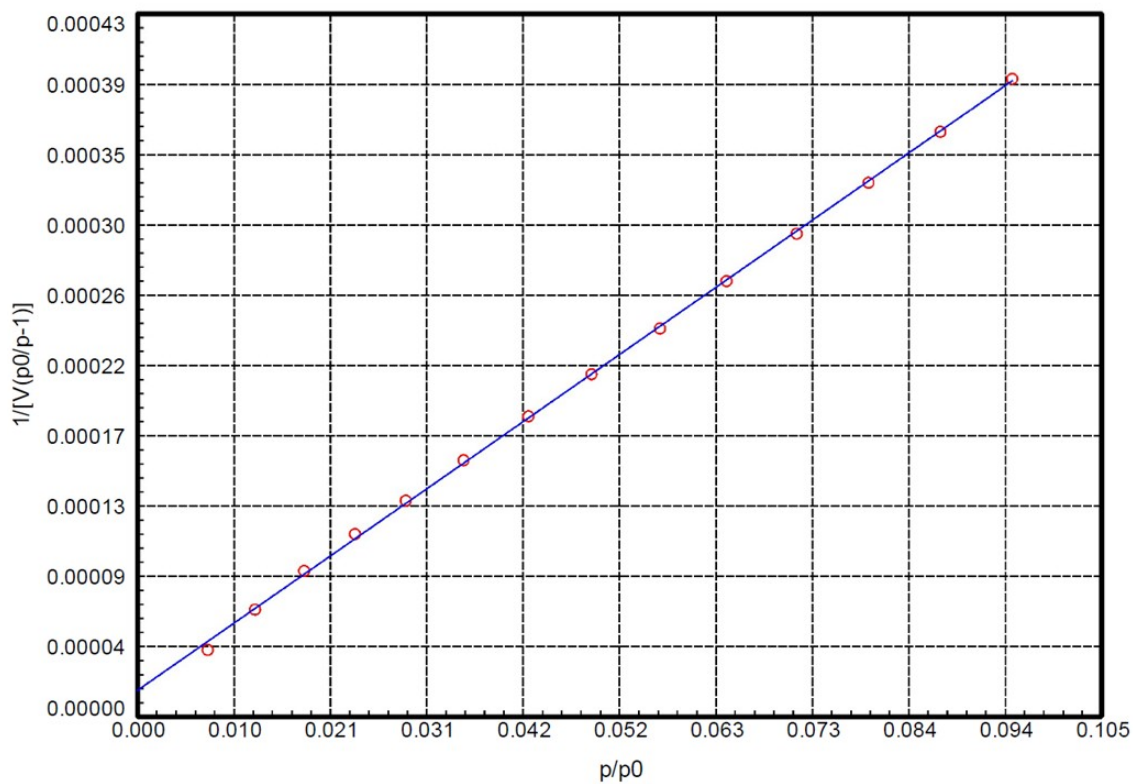

**Figure S49:** BET plot of  $ZrCl_4\_DMF-P-m100@$ .

**Table S15:** Comparison of the room temperature synthesis of UiO-66 starting from **ZrCBM** with room temperature methods starting from other metal precursors reported in the literature.

| Metal precursor                       | Solvent                      | Linker/metal ratio | Reaction time (h) | Yield (%)         | BET Area (m <sup>2</sup> g <sup>-1</sup> ) | Notes                                                                                                     | Ref.      |
|---------------------------------------|------------------------------|--------------------|-------------------|-------------------|--------------------------------------------|-----------------------------------------------------------------------------------------------------------|-----------|
| ZrCBM                                 | DMF                          | 1:1                | 24                | 77 <sup>[a]</sup> | 1138                                       | Addition of formic acid (formic acid/Zr ratio = 100:1)                                                    | This work |
| Zr( <i>On</i> -Pr) <sub>4</sub>       | DMF/acetic acid              | 2.85:1             | 16                | n.a.              | 1450                                       | Acetic acid/Zr ratio = 443; reaction mixture is treated at 130 °C for 2 h prior to addition of the linker | 8         |
| ZrOCl <sub>2</sub> ·8H <sub>2</sub> O | H <sub>2</sub> O/acetic acid | 1:1                | 0                 | 13                | 339                                        | pH = 4.9                                                                                                  | 6         |

<sup>[a]</sup>Calculated based on the formula in Table S13.

## References

- (1) Majano, G.; Pérez-Ramírez, J. Room Temperature Synthesis and Size Control of HKUST-1. *HCA* **2012**, *95* (11), 2278–2286. <https://doi.org/10.1002/hlca.201200466>.
- (2) Duan, C.; Yu, Y.; Li, F.; Wu, Y.; Xi, H. Ultrafast Room-Temperature Synthesis of Hierarchically Porous Metal–Organic Frameworks with High Space–Time Yields. *CrystEngComm* **2020**, *22* (15), 2675–2680. <https://doi.org/10.1039/C9CE01676G>.
- (3) Siew, W. Y.; Abu Bakar, N. H. H.; Abu Bakar, M. The Influence of Green Synthesis on the Formation of Various Copper Benzene-1,3,5-Tricarboxylate Compounds. *Inorganica Chimica Acta* **2018**, *482*, 53–61. <https://doi.org/10.1016/j.ica.2018.05.008>.
- (4) Fan, C.; Dong, H.; Liang, Y.; Yang, J.; Tang, G.; Zhang, W.; Cao, Y. Sustainable Synthesis of HKUST-1 and Its Composite by Biocompatible Ionic Liquid for Enhancing Visible-Light Photocatalytic Performance. *Journal of Cleaner Production* **2019**, *208*, 353–362. <https://doi.org/10.1016/j.jclepro.2018.10.141>.
- (5) Duan, C.; Li, F.; Luo, S.; Xiao, J.; Li, L.; Xi, H. Facile Synthesis of Hierarchical Porous Metal–Organic Frameworks with Enhanced Catalytic Activity. *Chemical Engineering Journal* **2018**, *334*, 1477–1483. <https://doi.org/10.1016/j.cej.2017.11.086>.
- (6) Huelsenbeck, L.; Luo, H.; Verma, P.; Dane, J.; Ho, R.; Beyer, E.; Hall, H.; Geise, G. M.; Giri, G. Generalized Approach for Rapid Aqueous MOF Synthesis by Controlling Solution pH. *Crystal Growth & Design* **2020**, *20* (10), 6787–6795. <https://doi.org/10.1021/acs.cgd.0c00895>.
- (7) Huo, J.; Brightwell, M.; El Hankari, S.; Garai, A.; Bradshaw, D. A Versatile, Industrially Relevant, Aqueous Room Temperature Synthesis of HKUST-1 with High Space–Time Yield. *J. Mater. Chem. A* **2013**, *1* (48), 15220. <https://doi.org/10.1039/c3ta14409g>.
- (8) DeStefano, M. R.; Islamoglu, T.; Garibay, S. J.; Hupp, J. T.; Farha, O. K. Room-Temperature Synthesis of UiO-66 and Thermal Modulation of Densities of Defect Sites. *Chem. Mater.* **2017**, *29* (3), 1357–1361. <https://doi.org/10.1021/acs.chemmater.6b05115>.
